# Supplementary material for: Accounting for epistasis improves genomic prediction of phenotypes with univariate and bivariate models across environments
Source: PubMed Central journal article supplement (PMC8354961; doi:10.1007/s00122-021-03868-1), 2021-06-11
Supplement: 122_2021_3868_MOESM1_ESM.pdf [file 122_2021_3868_MOESM1_ESM.pdf]

Theoretical and Applied Genetics

## **Accounting for epistasis improves genomic prediction of phenotypes with univariate and bivariate models across environments**

**Elaheh Vojgani<sup>1\*</sup>, Torsten Pook<sup>1</sup>, Johannes W.R. Martini<sup>2</sup>, Armin C. Hölker<sup>3</sup>, Manfred Mayer<sup>3</sup>, Chris-Carolin Schön<sup>3</sup>, Henner Simianer<sup>1</sup>**

<sup>1</sup> University of Goettingen, Center for Integrated Breeding Research, Animal Breeding and Genetics Group, Goettingen, Germany; <sup>2</sup> International Maize and Wheat Improvement Center (CIMMYT), Texcoco, State of Mexico, Mexico; <sup>3</sup> Plant Breeding, TUM School of Life Sciences Weihenstephan, Technical University of Munich, Freising, Germany

### **Corresponding author**

Correspondence to Elaheh Vojgani

Email: [vojgani@gwdg.de](mailto:vojgani@gwdg.de)

ORCID: 0000-0003-4375-3531

## Supplemental tables

**Table S1** Phenotypic traits descriptions, locations, number of lines, mean, minimum, maximum and standard deviation of phenotypic traits in each location for KE (blue numbers) and PE (red numbers).

| Trait | Definition                                                                                             | Location | Number of Phenotyped lines | Mean        | Minimum     | Maximum     | Standard deviation |
|-------|--------------------------------------------------------------------------------------------------------|----------|----------------------------|-------------|-------------|-------------|--------------------|
| EV_V3 | Early vigour at V3 stage scored on scale from 1 (very poor early vigour) to 9 (very high early vigour) | BBG      | 459\393                    | 4.10\4.68   | 0.78\1.00   | 7.28\7.55   | 1.28\1.18          |
|       |                                                                                                        | EIN      | 462\393                    | 4.11\4.70   | 0.86\1.03   | 9.00\9.03   | 1.31\1.18          |
|       |                                                                                                        | OLI      | 440\389                    | 5.31\6.17   | 1.22\3.30   | 8.05\8.74   | 1.15\0.86          |
|       |                                                                                                        | ROG      | 460\390                    | 5.35\5.84   | 1.71\2.90   | 7.90\7.92   | 0.95\0.75          |
|       |                                                                                                        | GOL      | 210\204                    | 6.31\6.67   | 4.07\5.49   | 8.49\7.98   | 0.69\0.51          |
|       |                                                                                                        | TOM      | 210\204                    | 5.51\6.15   | 1.93\3.84   | 7.34\8.45   | 0.99\0.67          |
| EV_V4 | Early vigour at V4 stage scored on scale from 1 (very poor early vigour) to 9 (very high early vigour) | BBG      | 459\393                    | 3.85\4.65   | 0.67\0.93   | 8.29\8.49   | 1.48\1.48          |
|       |                                                                                                        | EIN      | 462\393                    | 4.24\4.82   | 0.94\1.52   | 7.07\7.46   | 1.11\0.98          |
|       |                                                                                                        | OLI      | 439\389                    | 5.27\6.07   | 0.80\2.99   | 7.52\8.36   | 1.08\0.75          |
|       |                                                                                                        | ROG      | 459\390                    | 5.44\5.85   | 2.65\2.88   | 7.86\7.94   | 0.92\0.78          |
|       |                                                                                                        | GOL      | 210\204                    | 5.71\5.98   | 3.37\3.91   | 7.89\7.89   | 0.81\0.83          |
|       |                                                                                                        | TOM      | 210\204                    | 5.26\5.75   | 2.59\3.92   | 6.89\7.35   | 0.83\0.61          |
| EV_V6 | Early vigour at V6 stage scored on scale from 1 (very poor early vigour) to 9 (very high early vigour) | BBG      | 459\393                    | 3.92\4.64   | 0.74\0.84   | 8.75\8.22   | 1.39\1.41          |
|       |                                                                                                        | EIN      | 462\393                    | 5.03\5.54   | 0.97\1.51   | 8.05\8.39   | 1.24\1.06          |
|       |                                                                                                        | OLI      | 437\388                    | 5.30\6.07   | 0.54\3.56   | 7.17\8.09   | 0.96\0.74          |
|       |                                                                                                        | ROG      | 461\390                    | 5.55\5.91   | 1.02\2.52   | 8.07\7.76   | 0.95\0.77          |
|       |                                                                                                        | GOL      | 210\204                    | 6.24\6.24   | 3.90\3.81   | 8.45\7.94   | 0.85\0.85          |
|       |                                                                                                        | TOM      | 210\204                    | 5.58\5.86   | 2.96\3.90   | 7.66\7.91   | 0.92\0.68          |
| PH_V4 | Mean plant height of three plants of the plot at V4 stage in cm                                        | BBG      | 461\393                    | 35.86\41.48 | 9.27\16.38  | 60.40\62.85 | 8.43\7.93          |
|       |                                                                                                        | EIN      | 462\393                    | 34.49\38.73 | 6.90\20.43  | 53.14\57.94 | 7.24\6.17          |
|       |                                                                                                        | OLI      | 440\388                    | 18.43\22.55 | 7.35\11.89  | 31.11\35.75 | 3.93\3.87          |
|       |                                                                                                        | ROG      | 460\390                    | 25.50\28.10 | 9.23\13.63  | 42.29\41.54 | 4.60\4.53          |
|       |                                                                                                        | GOL      | 210\204                    | 62.88\68.98 | 34.30\38.39 | 88.24\95.30 | 9.79\10.96         |
|       |                                                                                                        | TOM      | 210\204                    | 41.60\47.45 | 11.98\25.37 | 63.89\72.12 | 8.71\8.27          |

| Trait    | Definition                                                                                 | Location | Number of Phenotyped lines | Mean          | Minimum      | Maximum       | Standard deviation |
|----------|--------------------------------------------------------------------------------------------|----------|----------------------------|---------------|--------------|---------------|--------------------|
| PH_V6    | Mean plant height of three plants of the plot at V6 stage in cm                            | BBG      | 461\393                    | 61.75\69.08   | 19.41\30.36  | 93.84\100.39  | 11.80\11.12        |
|          |                                                                                            | EIN      | 462\393                    | 62.40\69.36   | 21.41\36.53  | 95.54\98.80   | 11.89\9.62         |
|          |                                                                                            | OLI      | 440\390                    | 36.74\45.35   | 8.34\14.78   | 58.40\72.48   | 8.69\8.53          |
|          |                                                                                            | ROG      | 459\390                    | 61.46\68.91   | 32.17\30.35  | 89.74\94.77   | 9.34\9.52          |
|          |                                                                                            | GOL      | 210\204                    | 94.21\98.30   | 37.28\54.75  | 127.54\130.51 | 15.05\15.29        |
|          |                                                                                            | TOM      | 210\204                    | 83.86\92.35   | 48.46\57.81  | 119.07\124.98 | 14.41\12.79        |
| PH_final | Final plant height after flowering in cm                                                   | BBG      | 461\393                    | 142.65\120.60 | 95.85\59.78  | 210.08\179.03 | 20.53\19.11        |
|          |                                                                                            | EIN      | 462\393                    | 159.18\141.35 | 100.84\69.01 | 228.96\211.14 | 21.57\21.10        |
|          |                                                                                            | OLI      | 432\387                    | 118.17\112.46 | 58.74\58.55  | 175.81\173.15 | 21.95\20.48        |
|          |                                                                                            | ROG      | 461\390                    | 137.04\122.25 | 74.25\63.56  | 211.14\201.92 | 22.32\20.56        |
|          |                                                                                            | GOL      | 209\204                    | 115.68\102.69 | 49.27\30.21  | 167.58\149.14 | 21.73\23.59        |
|          |                                                                                            | TOM      | 210\204                    | 157.99\144.61 | 81.92\79.28  | 245.00\195.36 | 24.82\18.95        |
| FF       | Days after sowing until female flowering (days until 50% of the plot showed silks)         | BBG      | 461\393                    | 82.10\82.08   | 69.45\69.78  | 95.74\92.04   | 4.31\4.18          |
|          |                                                                                            | EIN      | 462\393                    | 82.55\81.78   | 70.36\68.86  | 102.02\101.50 | 5.23\5.17          |
|          |                                                                                            | OLI      | 346\347                    | 83.32\82.41   | 72.60\69.46  | 92.13\91.54   | 3.76\3.68          |
|          |                                                                                            | ROG      | 458\389                    | 73.06\71.91   | 62.45\59.10  | 91.22\88.03   | 4.82\4.47          |
|          |                                                                                            | TOM      | 209\203                    | 76.88\74.16   | 63.93\62.13  | 93.28\92.17   | 5.58\4.64          |
| RL       | Root lodging score from 1 to 9 (1 belonged to no lodging and 9 belonged to severe lodging) | BBG      | 461\392                    | 5.02\3.03     | 0.59\0.03    | 9.58\9.22     | 2.78\2.39          |
|          |                                                                                            | EIN      | 462\393                    | 3.48\2.23     | 0.63\0.76    | 9.21\8.08     | 2.29\1.54          |
|          |                                                                                            | OLI      | 439\388                    | 2.59\1.80     | 0.59\0.52    | 9.15\7.65     | 1.64\1.19          |
|          |                                                                                            | ROG      | 460\390                    | 2.39\1.50     | 0.96\0.95    | 9.01\8.50     | 2.21\1.13          |

**Table S2** The percentage of bivariate sERRBLUP model convergence in 5-fold cross validation with 5 replicates for trait PH-V4 for both KE and PE (black percentages), only KE (blue percentages) and only PE (red percentages). The starts represent the non-convergence of pre estimated variance components based on the full set.

| Predicted Environment | Additional Environment | Top 5 | Top 1 | Top 0.1 | Top 0.01 | Top 0.001 |
|-----------------------|------------------------|-------|-------|---------|----------|-----------|
| BBG                   | EIN                    | 100%  | 100%  | 100%    | 100%     | 100%*     |
| BBG                   | GOL                    | 0%*   | 8%*   | 12%     | 100%     | 100%      |
| EIN                   | BBG                    | 100%  | 100%  | 100%    | 100%     | 100%*     |
| EIN                   | GOL                    | 100%* | 100%* | 28%*    | 100%     | 100%      |
| OLI                   | GOL                    | 16%*  | 16%*  | 100%*   | 100%     | 100%      |
| ROG                   | BBG                    | 100%  | 100%  | 100%    | 100%     | 100%*     |
| ROG                   | GOL                    | 100%* | 100%* | 100%*   | 100%     | 100%      |
| TOM                   | BBG                    | 100%* | 100%* | 100%*   | 0%*      | 100%*     |
| TOM                   | EIN                    | 100%  | 100%* | 100%*   | 96%      | 100%*     |
| TOM                   | GOL                    | 100%* | 100%* | 100%*   | 64%      | 100%*     |

**Table S3** The percentage of bivariate sERRBLUP model convergence in 5-fold cross validation with 5 replicates for trait EV\_V3 for both KE and PE (black percentages), only KE (blue percentages) and only PE (red percentages). The stars represent the non-convergence of pre estimated variance components based on the full set.

| Predicted Environment | Additional Environment | Top 5 | Top 1 | Top 0.1 | Top 0.01  | Top 0.001   |
|-----------------------|------------------------|-------|-------|---------|-----------|-------------|
| BBG                   | EIN                    | 100%  | 100%  | 100%    | 100%      | 96%*        |
| BBG                   | GOL                    | 96%   | 100%  | 100%    | 100%      | 100%        |
| BBG                   | TOM                    | 100%  | 100%  | 100%    | 100%      | 88%         |
| EIN                   | ROG                    | 100%  | 100%  | 92%     | 96%       | 92%         |
| EIN                   | BBG                    | 100%  | 100%  | 100%    | 100%      | 88%*        |
| EIN                   | TOM                    | 100%  | 100%  | 96%     | 96%       | 96%         |
| OLI                   | ROG                    | 100%  | 100%  | 100%    | 92%       | 96%         |
| OLI                   | EIN                    | 100%  | 100%  | 100%    | 92%       | 0%* / 96%   |
| OLI                   | BBG                    | 100%  | 100%  | 96%     | 96% / 88% | 100%* / 76% |
| OLI                   | GOL                    | 96%   | 96%   | 88%     | 96%       | 92%         |
| OLI                   | TOM                    | 92%   | 96%   | 72%     | 72%*      | 60%*        |
| ROG                   | EIN                    | 100%  | 100%  | 96%     | 52%*      | 0%* / 76%   |
| ROG                   | BBG                    | 100%  | 100%  | 100%    | 96% / 92% | 0%*         |
| ROG                   | GOL                    | 100%  | 100%  | 96%     | 92%       | 96%         |
| ROG                   | TOM                    | 100%  | 100%  | 100%    | 84%       | 100%        |
| GOL                   | ROG                    | 100%  | 100%  | 100%    | 92%       | 100%        |
| GOL                   | EIN                    | 100%  | 100%  | 100%    | 100%      | 0%*         |
| GOL                   | BBG                    | 100%  | 100%  | 96%     | 96%       | 80%* / 96%  |
| GOL                   | OLI                    | 96%   | 92%   | 96%     | 92%       | 88%         |
| GOL                   | TOM                    | 100%  | 100%  | 100%    | 88% / 80% | 80% / 96%   |
| TOM                   | EIN                    | 96%   | 92%   | 64%     | 44%*      | 0%*         |
| TOM                   | BBG                    | 100%  | 100%  | 100%    | 96%       | 80%*        |
| TOM                   | OLI                    | 96%   | 100%  | 100%    | 100%      | 92%         |
| TOM                   | GOL                    | 0%*   | 96%   | 100%    | 80%       | 96% / 96%   |

**Table S4** The percentage of bivariate sERRBLUP model convergence in 5-fold cross validation with 5 replicates for trait EV\_V4 for both KE and PE (black percentages), only KE (blue percentages) and only PE (red percentages). The stars represent the non-convergence of pre estimated variance components based on the full set.

| Predicted Environment | Additional Environment | Top 5 | Top 1 | Top 0.1    | Top 0.01  | Top 0.001 |
|-----------------------|------------------------|-------|-------|------------|-----------|-----------|
| BBG                   | EIN                    | 100%  | 100%  | 100%       | 100%      | 12%*      |
| BBG                   | GOL                    | 100%  | 100%  | 96%        | 68%       | 56%       |
| EIN                   | OLI                    | 100%  | 96%   | 100%       | 100%      | 100%      |
| OLI                   | EIN                    | 88%   | 88%   | 96% / 16%* | 96% / 4%* | 8%* / 8%* |
| OLI                   | BBG                    | 100%  | 100%  | 96%        | 100%      | 100%      |
| OLI                   | GOL                    | 100%  | 100%  | 100%       | 96%       | 100%      |
| OLI                   | TOM                    | 100%  | 100%  | 100%       | 96%       | 96%       |
| ROG                   | EIN                    | 100%  | 100%  | 100%       | 100%      | 0%*       |
| GOL                   | EIN                    | 100%  | 100%  | 100%       | 100%      | 0%*       |
| GOL                   | TOM                    | 100%  | 96%   | 100%       | 100%      | 100%      |
| TOM                   | ROG                    | 100%  | 96%   | 100%       | 92%       | 100%      |
| TOM                   | EIN                    | 100%  | 96%   | 88%        | 100%      | 100%      |
| TOM                   | BBG                    | 100%  | 96%   | 25%*       | 40%*      | 80%       |
| TOM                   | GOL                    | 80%   | 80%   | 96% / 48%* | 96%       | 80%       |

**Table S5** The percentage of bivariate sERRBLUP model convergence in 5-fold cross validation with 5 replicates for trait EV\_V6 for both KE and PE (black percentages), only KE (blue percentages) and only PE (red percentages). The starts represent the non-convergence of pre estimated variance components based on the full set.

| Predicted Environment | Additional Environment | Top 5      | Top 1      | Top 0.1     | Top 0.01   | Top 0.001   |
|-----------------------|------------------------|------------|------------|-------------|------------|-------------|
| BBG                   | ROG                    | 100%       | 100%       | 100%        | 100%       | 80%*        |
| BBG                   | EIN                    | 100%       | 100%       | 96%         | 92%        | 0%*         |
| BBG                   | GOL                    | 0%* / 25%* | 0%* / 48%* | 24%* / 24%* | 0%*        | 100%        |
| EIN                   | ROG                    | 100%       | 100%       | 96%         | 80%* / 96% | 52%* / 96%  |
| EIN                   | GOL                    | 4%* / 0%*  | 4%* / 88%* | 48%* / 0%*  | 32%        | 100%        |
| OLI                   | EIN                    | 100%       | 100%       | 88%         | 88%        | 4%* / 84%   |
| OLI                   | ROG                    | 100%       | 100%       | 100%        | 100%       | 0%*         |
| OLI                   | GOL                    | 25%* / 0%* | 72% / 96%  | 24%* / 4%*  | 12%*       | 100%        |
| ROG                   | EIN                    | 100%       | 100%       | 92%         | 80%        | 40%* / 88%  |
| ROG                   | BBG                    | 96%        | 96%        | 100%        | 96% / 84%* | 96% / 52%*  |
| ROG                   | OLI                    | 100%       | 100%       | 96%         | 100%       | 96%         |
| ROG                   | GOL                    | 25% / 0%*  | 0%* / 96%  | 0%* / 36%   | 0%         | 100%        |
| GOL                   | ROG                    | 100%       | 100%       | 100%        | 100%       | 96%*        |
| GOL                   | EIN                    | 100%       | 100%       | 100%        | 100%       | 80%*        |
| TOM                   | ROG                    | 100%       | 96%        | 24%*        | 60%* / 96% | 0%* / 72%   |
| TOM                   | EIN                    | 100%       | 100%       | 72%         | 72%        | 0%*         |
| TOM                   | BBG                    | 100%       | 76%        | 76% / 96%   | 84%        | 84%         |
| TOM                   | OLI                    | 100%       | 100%       | 100%        | 100%       | 96%         |
| TOM                   | GOL                    | 0%* / 0%   | 0%* / 84%  | 0%* / 0%    | 16%* / 0%* | 25%* / 60%* |



**Table S6** The percentage of bivariate sERRBLUP model convergence in 5-fold cross validation with 5 replicates for trait PH\_V6 for both KE and PE (black percentages), only KE (blue percentages) and only PE (red percentages). The starts represent the non-convergence of pre estimated variance components based on the full set.

| Predicted Environment | Additional Environment | Top 5 | Top 1      | Top 0.1    | Top 0.01 | Top 0.001  |
|-----------------------|------------------------|-------|------------|------------|----------|------------|
| BBG                   | ROG                    | 100%  | 100%       | 100%       | 96%      | 80%*       |
| BBG                   | EIN                    | 92%   | 100%       | 100%       | 100%     | 100%       |
| BBG                   | OLI                    | 100%  | 100%       | 100%       | 100%     | 36%        |
| BBG                   | GOL                    | 100%  | 100%       | 96%        | 96%      | 92%*       |
| EIN                   | ROG                    | 100%  | 100%       | 100%       | 100%     | 0%*        |
| EIN                   | BBG                    | 100%  | 100%       | 80%        | 100%     | 32%*       |
| EIN                   | OLI                    | 100%  | 100%       | 100%       | 100%     | 96%        |
| EIN                   | GOL                    | 100%  | 100%       | 100%       | 100%     | 100%*      |
| OLI                   | ROG                    | 100%  | 100%       | 96%        | 68%      | 16%*       |
| OLI                   | EIN                    | 100%  | 100%       | 100%       | 100%     | 92%        |
| OLI                   | BBG                    | 100%  | 100%       | 100%       | 100%     | 56%*       |
| OLI                   | GOL                    | 100%  | 100%       | 100%       | 96%      | 0%*        |
| ROG                   | EIN                    | 100%  | 100%       | 100%       | 100%     | 92%        |
| ROG                   | BBG                    | 100%  | 100%       | 100%       | 96%      | 84%*       |
| ROG                   | OLI                    | 100%  | 100%       | 100%       | 100%     | 0%*        |
| ROG                   | GOL                    | 100%  | 100%       | 100%       | 100%     | 8%*        |
| GOL                   | ROG                    | 100%  | 100%       | 100%       | 100%     | 96%*       |
| GOL                   | BBG                    | 100%  | 100%       | 100%       | 100%     | 0%* / 96%  |
| GOL                   | OLI                    | 100%  | 100%       | 100%       | 100%     | 0%*        |
| TOM                   | ROG                    | 100%  | 100%       | 92%        | 88%      | 40%*       |
| TOM                   | EIN                    | 100%  | 100%       | 100%       | 100%     | 100%       |
| TOM                   | BBG                    | 100%  | 100%       | 32%        | 92%      | 0%*        |
| TOM                   | OLI                    | 100%  | 100%       | 100%       | 96%      | 4%*        |
| TOM                   | GOL                    | 52%*  | 68%* / 88% | 72%* / 92% | 92%      | 16%* / 96% |

**Table S7** The percentage of bivariate sERRBLUP model convergence in 5-fold cross validation with 5 replicates for trait PH\_final for both KE and PE (black percentages), only KE (blue percentages) and only PE (red percentages). The stars represent the non-convergence of pre estimated variance components based on the full set.

| Predicted Environment | Additional Environment | Top 5      | Top 1     | Top 0.1   | Top 0.01   | Top 0.001  |
|-----------------------|------------------------|------------|-----------|-----------|------------|------------|
| BBG                   | ROG                    | 52%* / 0%* | 0%* / 0%* | 0%* / 0%* | 0%*        | 100%       |
| BBG                   | EIN                    | 100%       | 100%      | 100%      | 100%       | 96%        |
| BBG                   | TOM                    | 36%*       | 4%*       | 0%*       | 92%        | 100%       |
| EIN                   | ROG                    | 0%* / 25%  | 0%* / 0%* | 0%* / 0%* | 96% / 0%*  | 92%        |
| EIN                   | BBG                    | 8%*        | 4%*       | 0%*       | 96%        | 96%        |
| EIN                   | OLI                    | 100%       | 100%      | 100%      | 100%       | 92%        |
| EIN                   | TOM                    | 64%        | 4%*       | 0%*       | 100%       | 100%       |
| OLI                   | ROG                    | 0%* / 4%*  | 0%* / 0%* | 0%* / 0%* | 0%*        | 96%        |
| OLI                   | EIN                    | 100%       | 96%       | 100%      | 100%       | 100%       |
| OLI                   | BBG                    | 4%*        | 0%*       | 0%*       | 100%       | 96%        |
| OLI                   | GOL                    | 100%       | 100%      | 100%      | 100%       | 100%       |
| OLI                   | TOM                    | 28%*       | 12%*      | 0%*       | 96% / 84%* | 92%        |
| ROG                   | EIN                    | 100%       | 100%      | 100%      | 100%       | 96%        |
| ROG                   | BBG                    | 40%*       | 0%*       | 0%*       | 100%       | 100%       |
| ROG                   | TOM                    | 24%*       | 8%*       | 4%*       | 88%        | 100%       |
| GOL                   | ROG                    | 8%* / 0%*  | 4%* / 4%* | 8%* / 4%* | 0%*        | 100%       |
| GOL                   | BBG                    | 8%*        | 4%*       | 4%*       | 100%       | 100%       |
| GOL                   | TOM                    | 0%*        | 0%*       | 4%*       | 88%        | 100%       |
| TOM                   | ROG                    | 0%* / 0%*  | 0%* / 0%* | 0%* / 0%* | 36%* / 0%* | 48%* / 96% |
| TOM                   | EIN                    | 100%       | 100%      | 84%       | 76%        | 40%* / 96% |
| TOM                   | BBG                    | 8%*        | 0%*       | 0%*       | 88%        | 52%*       |
| TOM                   | OLI                    | 100%       | 100%      | 92%       | 92%        | 96%        |
| TOM                   | GOL                    | 100%       | 100%      | 96%       | 100%       | 96%        |

**Table S8** The percentage of bivariate sERRBLUP model convergence in 5-fold cross validation with 5 replicates for trait FF for both KE and PE (black percentages), only KE (blue percentages) and only PE (red percentages). The starts represent the non-convergence of pre estimated variance components based on the full set.

| Predicted Environment | Additional Environment | Top 5      | Top 1     | Top 0.1    | Top 0.01   | Top 0.001  |
|-----------------------|------------------------|------------|-----------|------------|------------|------------|
| BBG                   | EIN                    | 4%*        | 4%*       | 0%*        | 92% / 32%* | 80%        |
| BBG                   | ROG                    | 0%*        | 0%*       | 0%* / 0%*  | 80% / 0%*  | 68%        |
| EIN                   | BBG                    | 96% / 36%* | 92% / 96% | 92% / 0%*  | 88%* / 0%* | 88% / 96%  |
| EIN                   | ROG                    | 0%*        | 0%*       | 0%* / 0%*  | 96% / 0%*  | 96% / 84%  |
| OLI                   | ROG                    | 0%*        | 92% / 0%* | 16%* / 0%* | 10 / 0%*   | 92% / 76%  |
| OLI                   | BBG                    | 100%       | 84%       | 0%*        | 4%*        | 96% / 32%* |
| OLI                   | EIN                    | 64%*       | 20%       | 0%*        | 52%*       | 44%*       |
| ROG                   | EIN                    | 0%*        | 0%*       | 0%*        | 80%        | 52%*       |
| ROG                   | BBG                    | 40%        | 100%      | 0%*        | 0%*        | 96%        |
| TOM                   | EIN                    | 28%*       | 20%*      | 24%*       | 40%*       | 72% / 12%* |
| TOM                   | BBG                    | 72%        | 100%      | 4%*        | 8%*        | 96%        |
| TOM                   | OLI                    | 100%       | 100%      | 96%        | 96%        | 96%        |
| TOM                   | ROG                    | 12%*       | 96% / 0%  | 0%* / 4%*  | 20%* / 4%* | 4%* / 40%* |

**Table S9** The percentage of bivariate sERRBLUP model convergence in 5-fold cross validation with 5 replicates for trait RL for both KE and PE (black percentages), only KE (blue percentages) and only PE (red percentages). The starts represent the non-convergence of pre estimated variance components based on the full set.

| Predicted Environment | Additional Environment | Top 5 | Top 1 | Top 0.1 | Top 0.01 | Top 0.001  |
|-----------------------|------------------------|-------|-------|---------|----------|------------|
| BBG                   | EIN                    | 100%  | 100%  | 100%    | 100%     | 96%        |
| EIN                   | ROG                    | 100%  | 100%  | 96%     | 96%      | 96%        |
| EIN                   | BBG                    | 100%  | 72%   | 60%*    | 20%*     | 96% / 16%* |
| EIN                   | OLI                    | 92%   | 92%   | 92%     | 96%      | 68%        |
| ROG                   | EIN                    | 100%  | 100%  | 96%     | 88%      | 68%        |
| ROG                   | BBG                    | 100%  | 100%  | 100%    | 96%      | 96%        |
| ROG                   | OLI                    | 100%  | 100%  | 96%     | 100%     | 100%       |

**Table S10** The predictive ability of RKHS, univariate GBLUP within environments, univariate ERRBLUP within environments and maximum univariate sERRBLUP across environments (blue numbers) and the maximum predictive ability of bivariate GBLUP, bivariate ERRBLUP and bivariate sERRBLUP (red numbers) in KE and PE for the trait PH\_V4.

| Landrace | Locations | RKHS  | GBLUP       | ERRBLUP     | sERRBLUP    |
|----------|-----------|-------|-------------|-------------|-------------|
| KE       | BBG       | 0.479 | 0.470/0.721 | 0.468/0.754 | 0.707/0.822 |
|          | EIN       | 0.479 | 0.455/0.713 | 0.458/0.748 | 0.679/0.812 |
|          | OLI       | 0.435 | 0.439/0.627 | 0.438/0.655 | 0.623/0.717 |
|          | ROG       | 0.460 | 0.469/0.674 | 0.467/0.707 | 0.665/0.784 |
|          | GOL       | 0.543 | 0.519/0.730 | 0.521/0.742 | 0.694/0.759 |
|          | TOM       | 0.353 | 0.346/0.660 | 0.350/0.681 | 0.617/0.691 |
| PE       | BBG       | 0.423 | 0.424/0.692 | 0.426/0.715 | 0.648/0.784 |
|          | EIN       | 0.420 | 0.412/0.680 | 0.413/0.704 | 0.652/0.775 |
|          | OLI       | 0.334 | 0.324/0.582 | 0.326/0.602 | 0.558/0.665 |
|          | ROG       | 0.422 | 0.449/0.638 | 0.447/0.654 | 0.584/0.688 |
|          | GOL       | 0.590 | 0.604/0.697 | 0.606/0.706 | 0.664/0.731 |
|          | TOM       | 0.342 | 0.370/0.614 | 0.370/0.630 | 0.528/0.662 |

## Supplemental figures

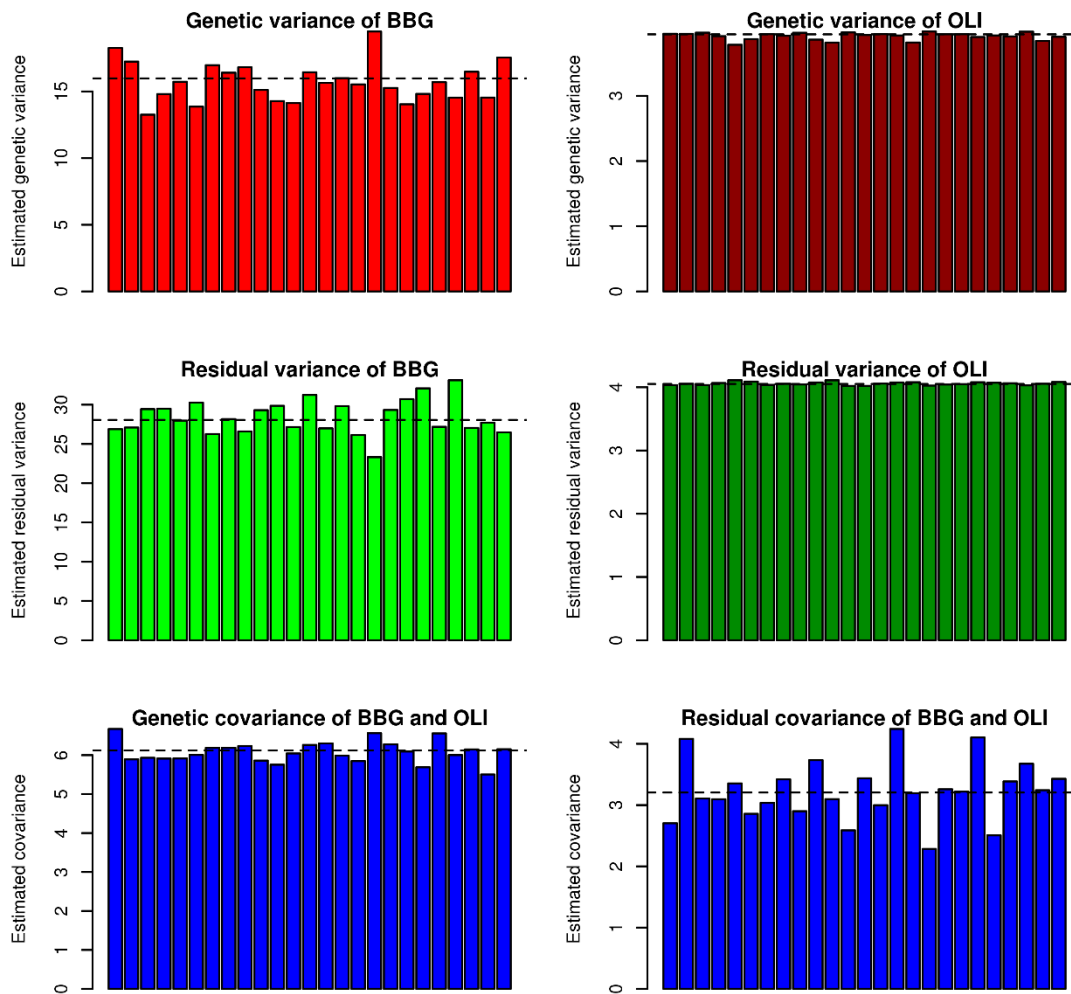

5-fold cross validation with 5 replicates

**Fig. S1** Comparison of pre estimated genetic and residual variances and covariances of converged bivariate sERRBLUP model (top 5%) based on the full dataset (dashed horizontal lines) and estimated genetic and residual variances and covariances of converged bivariate sERRBLUP (top 5%) based on training set in each run of 5-fold cross validation with 5 replicates (colored bars) for predicting BBG when the additional environment is OLI in KE for trait PH\_V4.

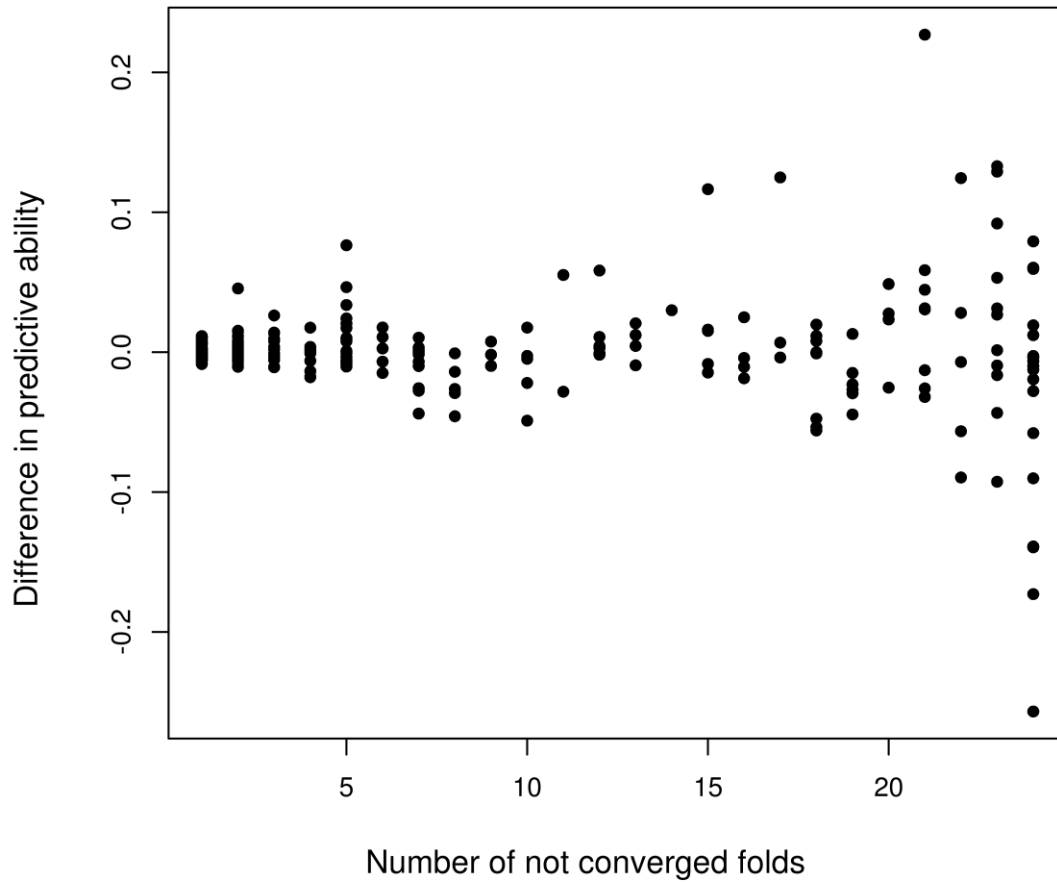

**Fig. S2** The difference between the mean predictive ability of only the converged folds and the mean predictive ability of all folds in 5-fold cross validation with 5 replicates vs. the number of the folds (1 to 24) which did not converge across all traits in all combinations for both KE and PE.

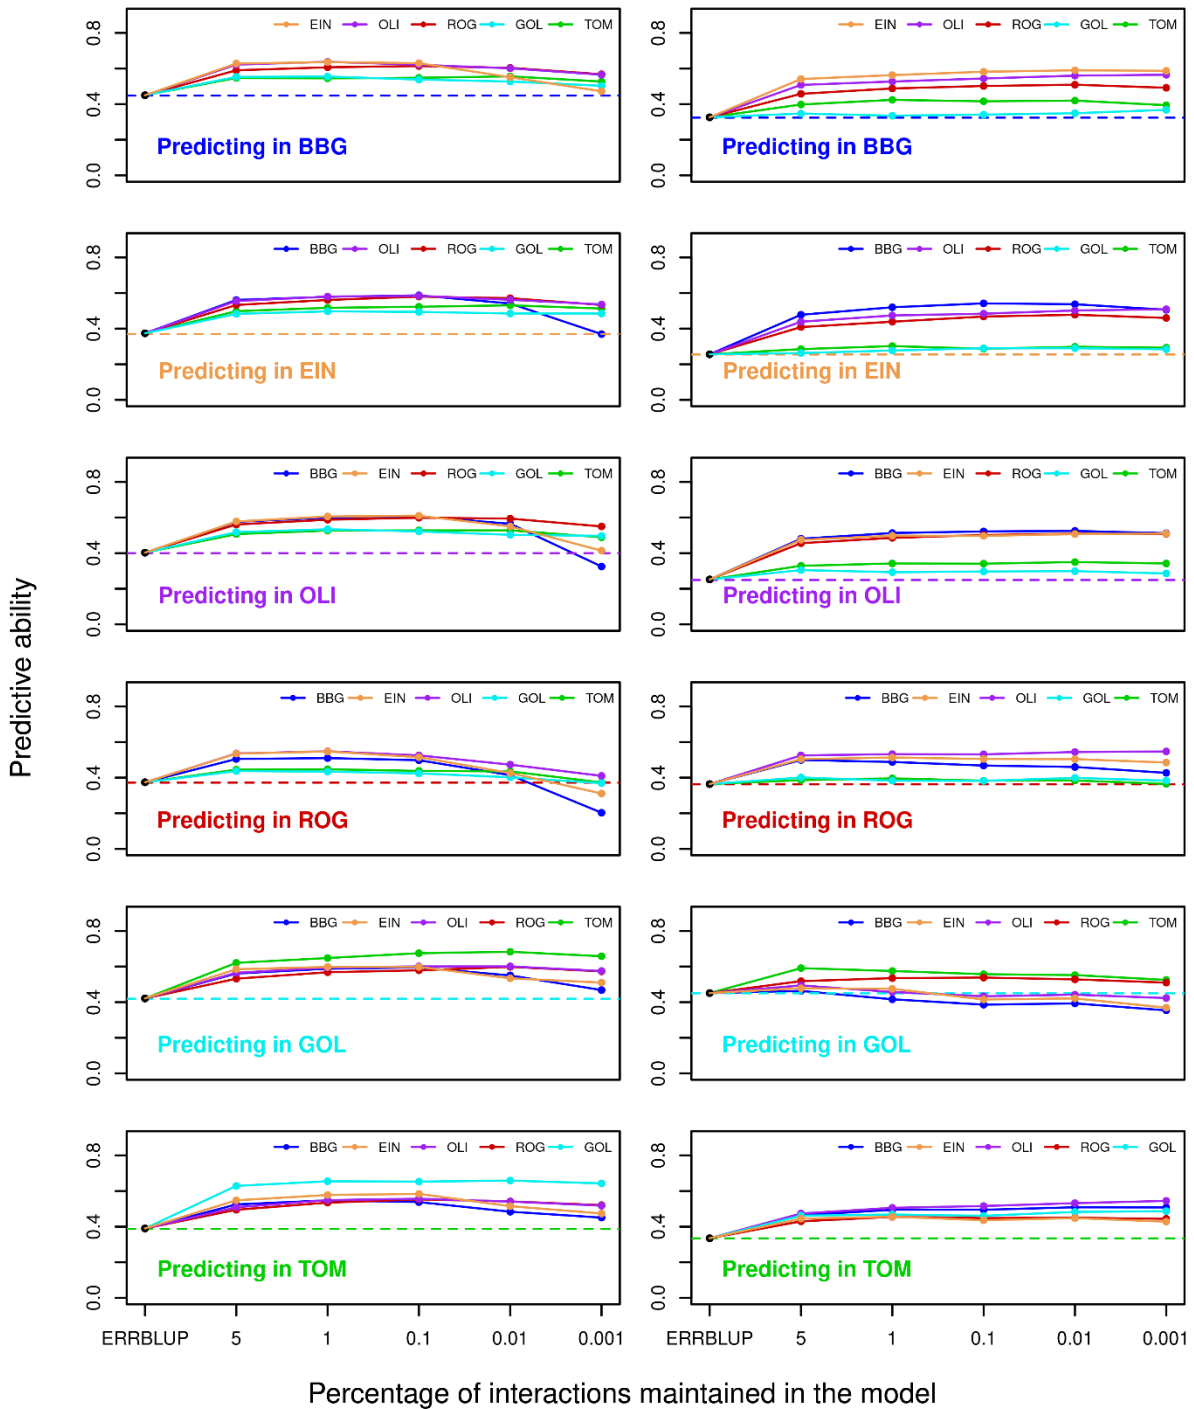

**Fig. S3a** Predictive ability for univariate GBLUP within environment (dashed horizontal line), univariate ERRBLUP within environment (black filled circle) and univariate sERRBLUP across environments when the SNP interaction selections are based on estimated effects variances (solid colored lines) for trait EV\_V3 in KE (left side plots) and PE (right side plots). In each panel, the solid lines' color indicates the environment in which the relationship matrices determined by variable selection.



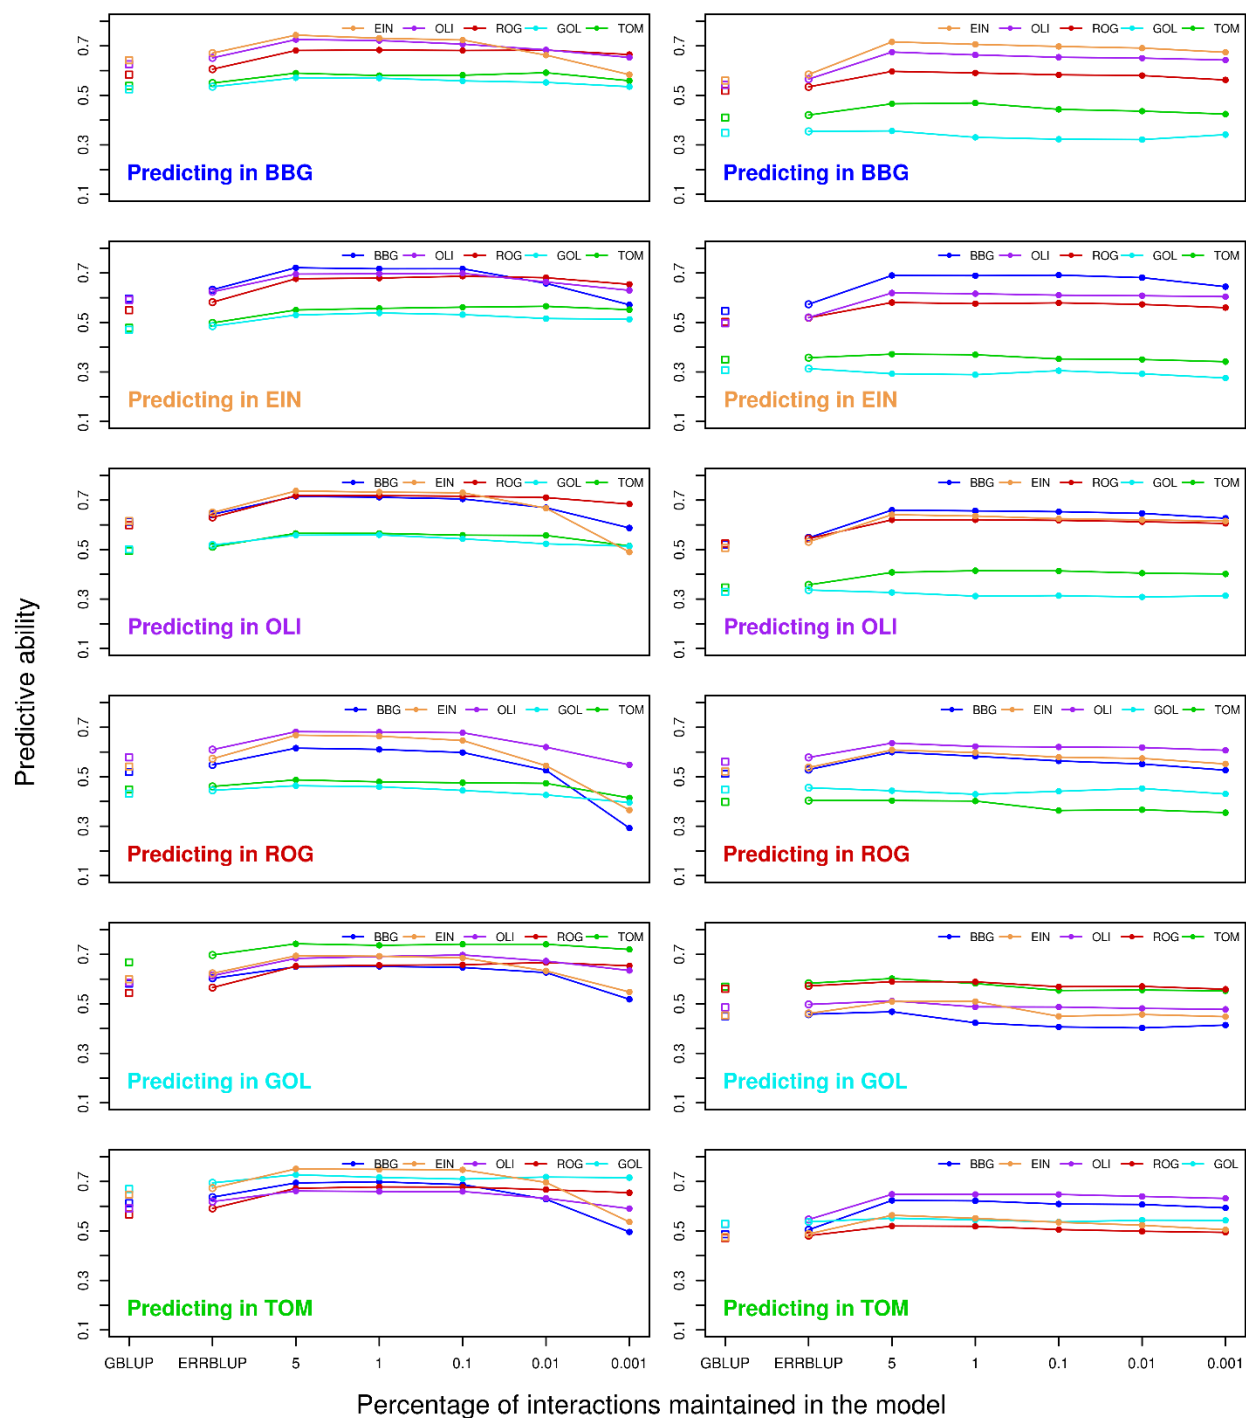

**Fig. S3b** Predictive ability for bivariate GBLUP (open squares), bivariate ERRBLUP (open circles) and bivariate sERRBLUP (filled circles and solid lines) when SNP interaction selections are based on estimated effects variances in KE (left side) and PE (right side) for trait EV-V3. In each panel, the solid lines' color indicates the additional environment used to predict the target environment.

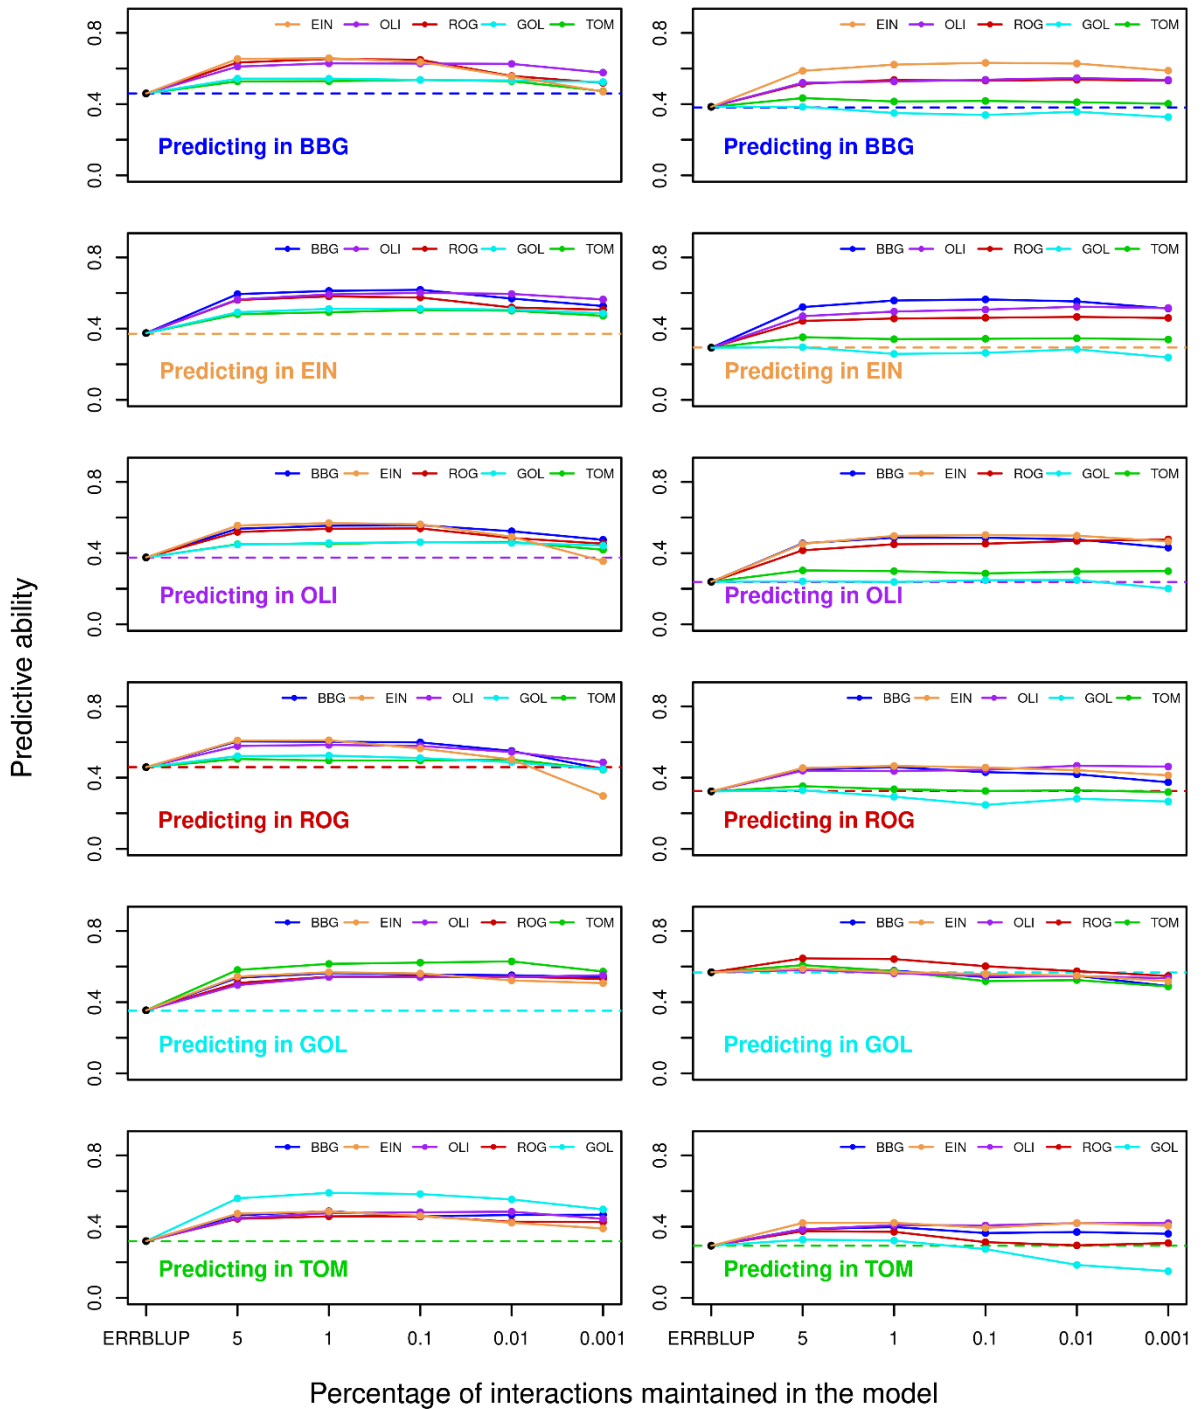

**Fig. S4a** Predictive ability for univariate GBLUP within environment (dashed horizontal line), univariate ERRBLUP within environment (black filled circle) and univariate sERRBLUP across environments when the SNP interaction selections are based on estimated effects variances (solid colored lines) for trait EV\_V4 in KE (left side plots) and PE (right side plots). In each panel, the solid lines' color indicates the environment in which the relationship matrices determined by variable selection.

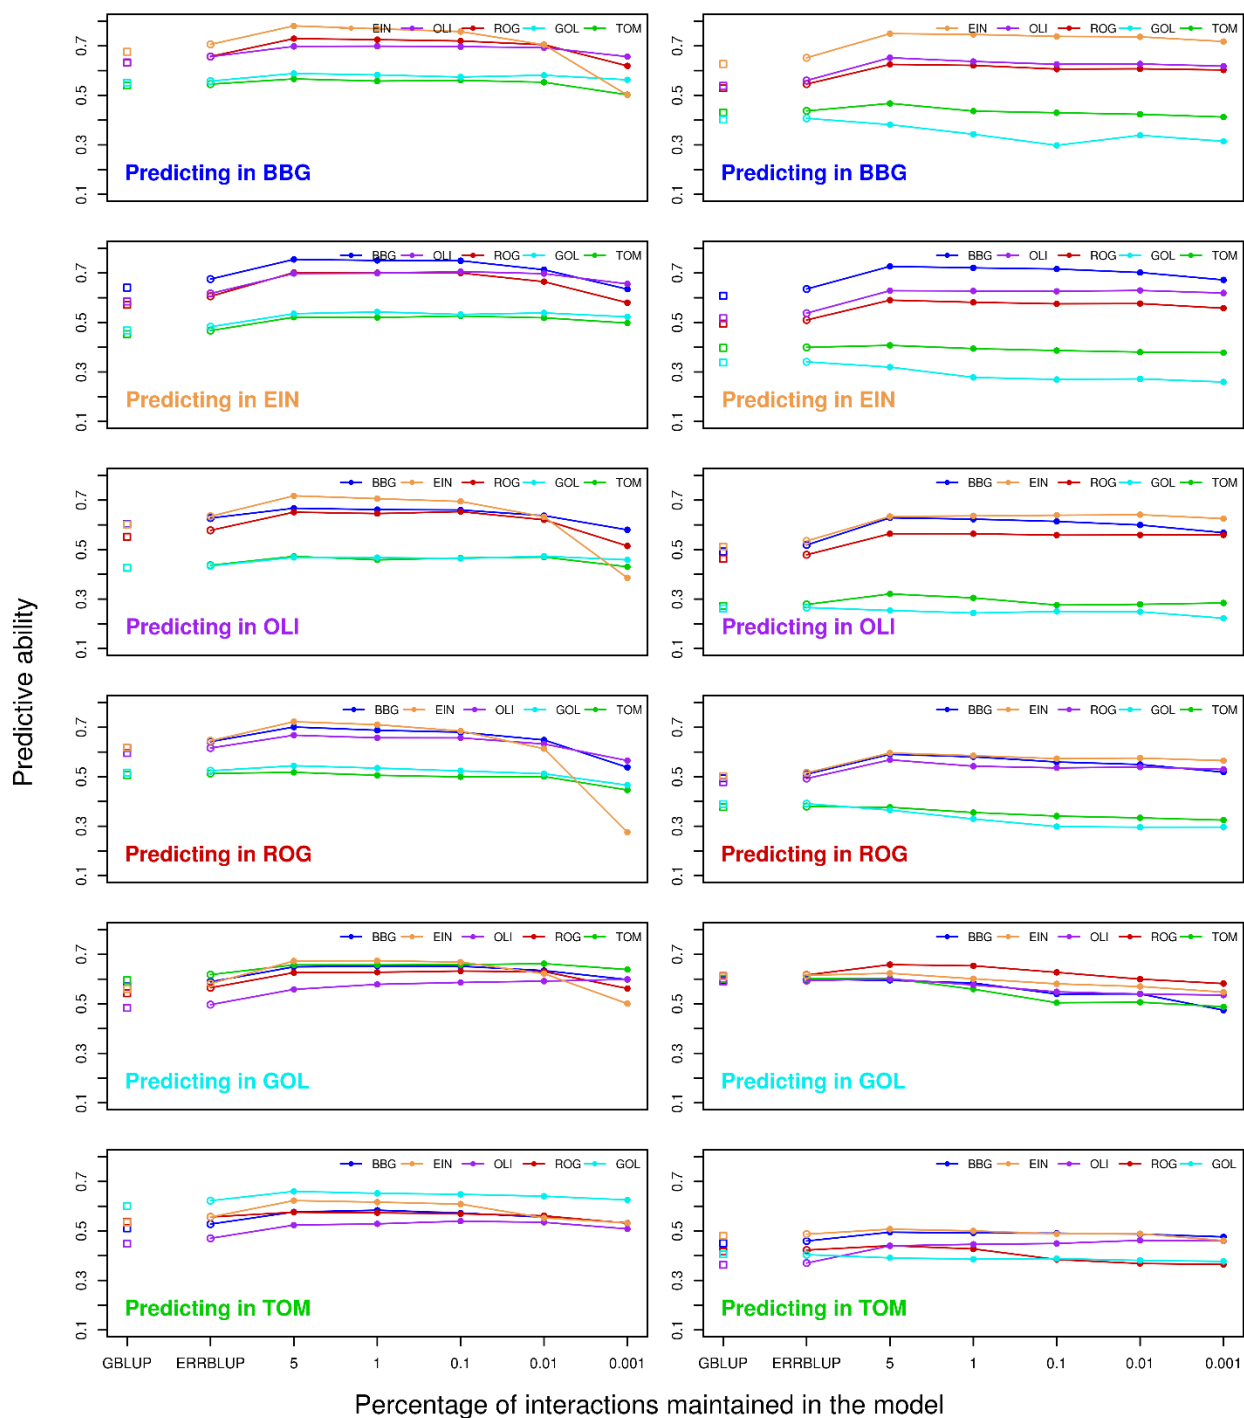

**Fig. S4b** Predictive ability for bivariate GBLUP (open squares), bivariate ERRBLUP (open circles) and bivariate sERRBLUP (filled circles and solid lines) when SNP interaction selections are based on estimated effects variances in KE (left side) and PE (right side) for trait EV-V4. In each panel, the solid lines' color indicates the additional environment used to predict the target environment.

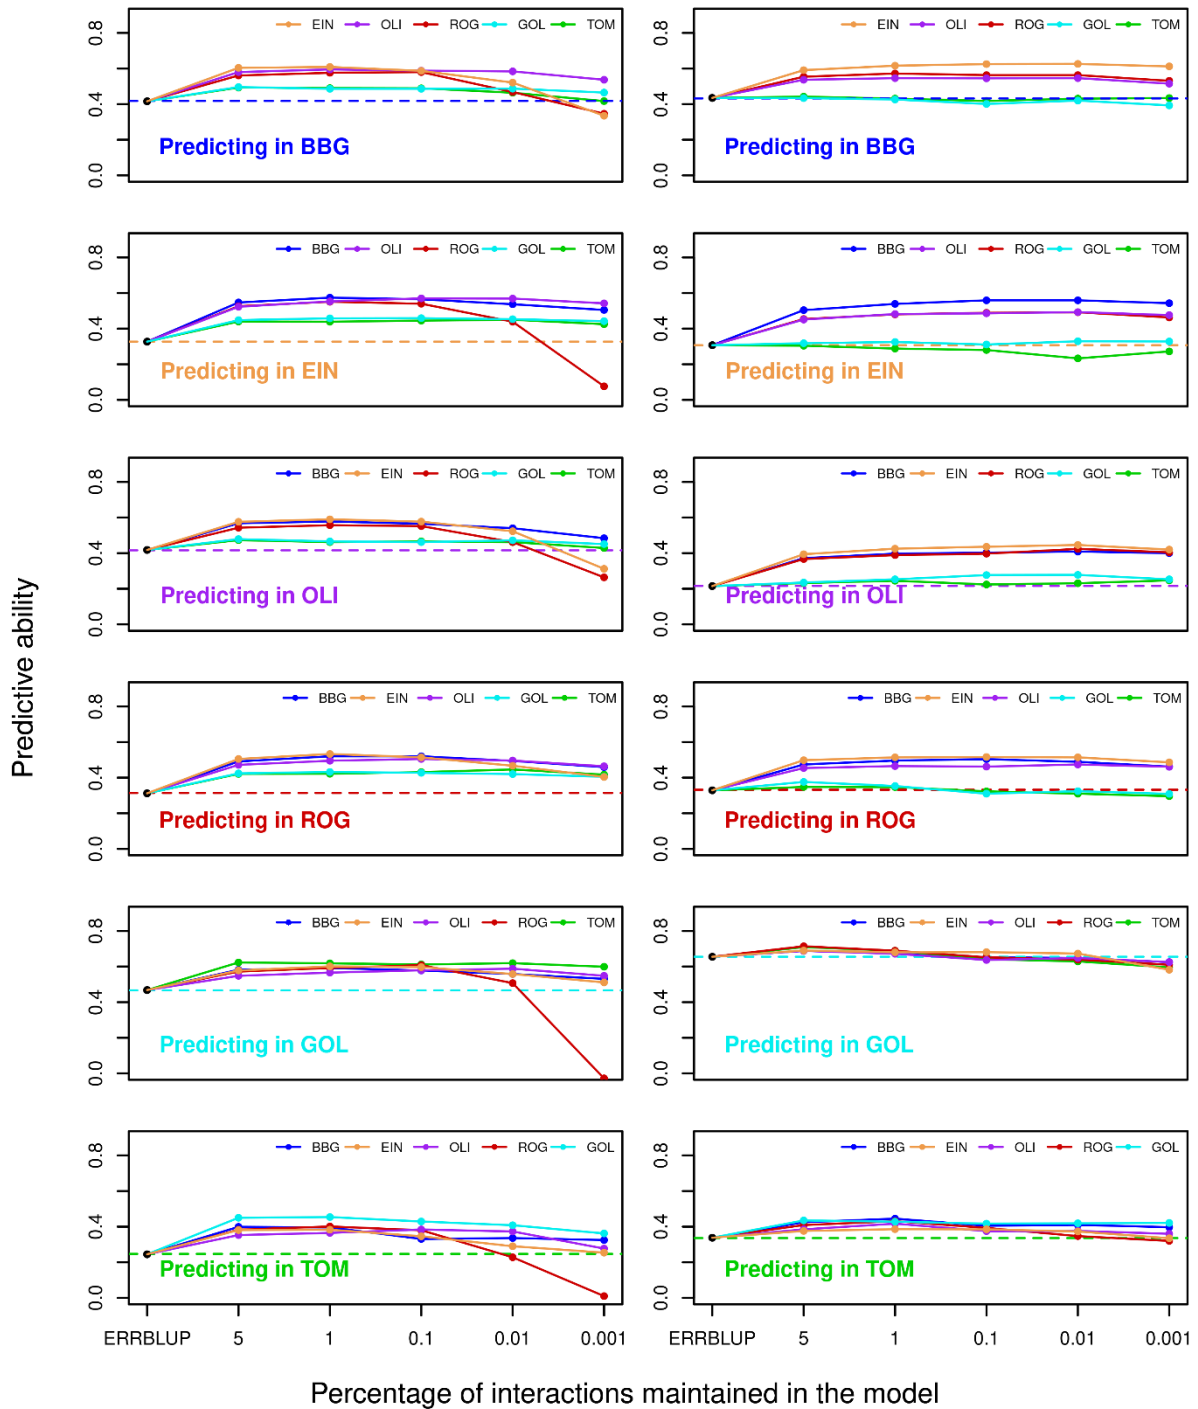

**Fig. S5a** Predictive ability for univariate GBLUP within environment (dashed horizontal line), univariate ERRBLUP within environment (black filled circle) and univariate sERRBLUP across environments when the SNP interaction selections are based on estimated effects variances (solid colored lines) for trait EV\_V6 in KE (left side plots) and PE (right side plots). In each panel, the solid lines' color indicates the environment in which the relationship matrices determined by variable selection.

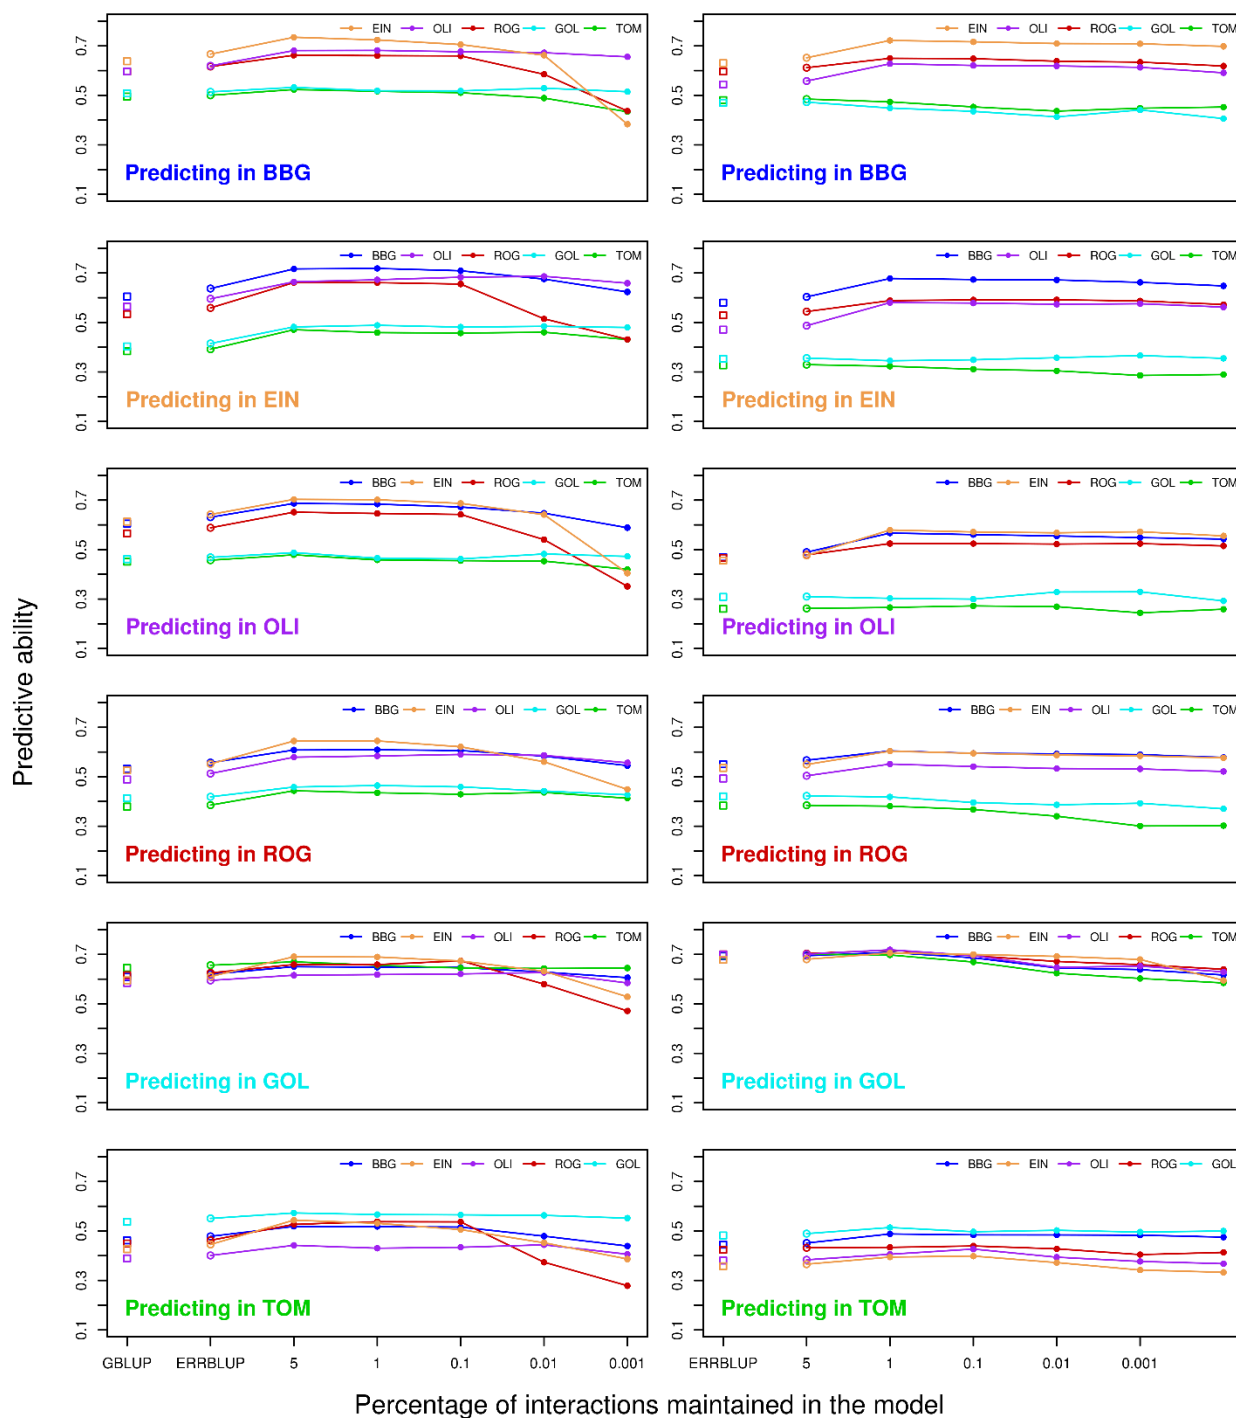

**Fig. S5b** Predictive ability for bivariate GBLUP (open squares), bivariate ERRBLUP (open circles) and bivariate sERRBLUP (filled circles and solid lines) when SNP interaction selections are based on estimated effects variances in KE (left side) and PE (right side) for trait EV-V6. In each panel, the solid lines' color indicates the additional environment used to predict the target environment.

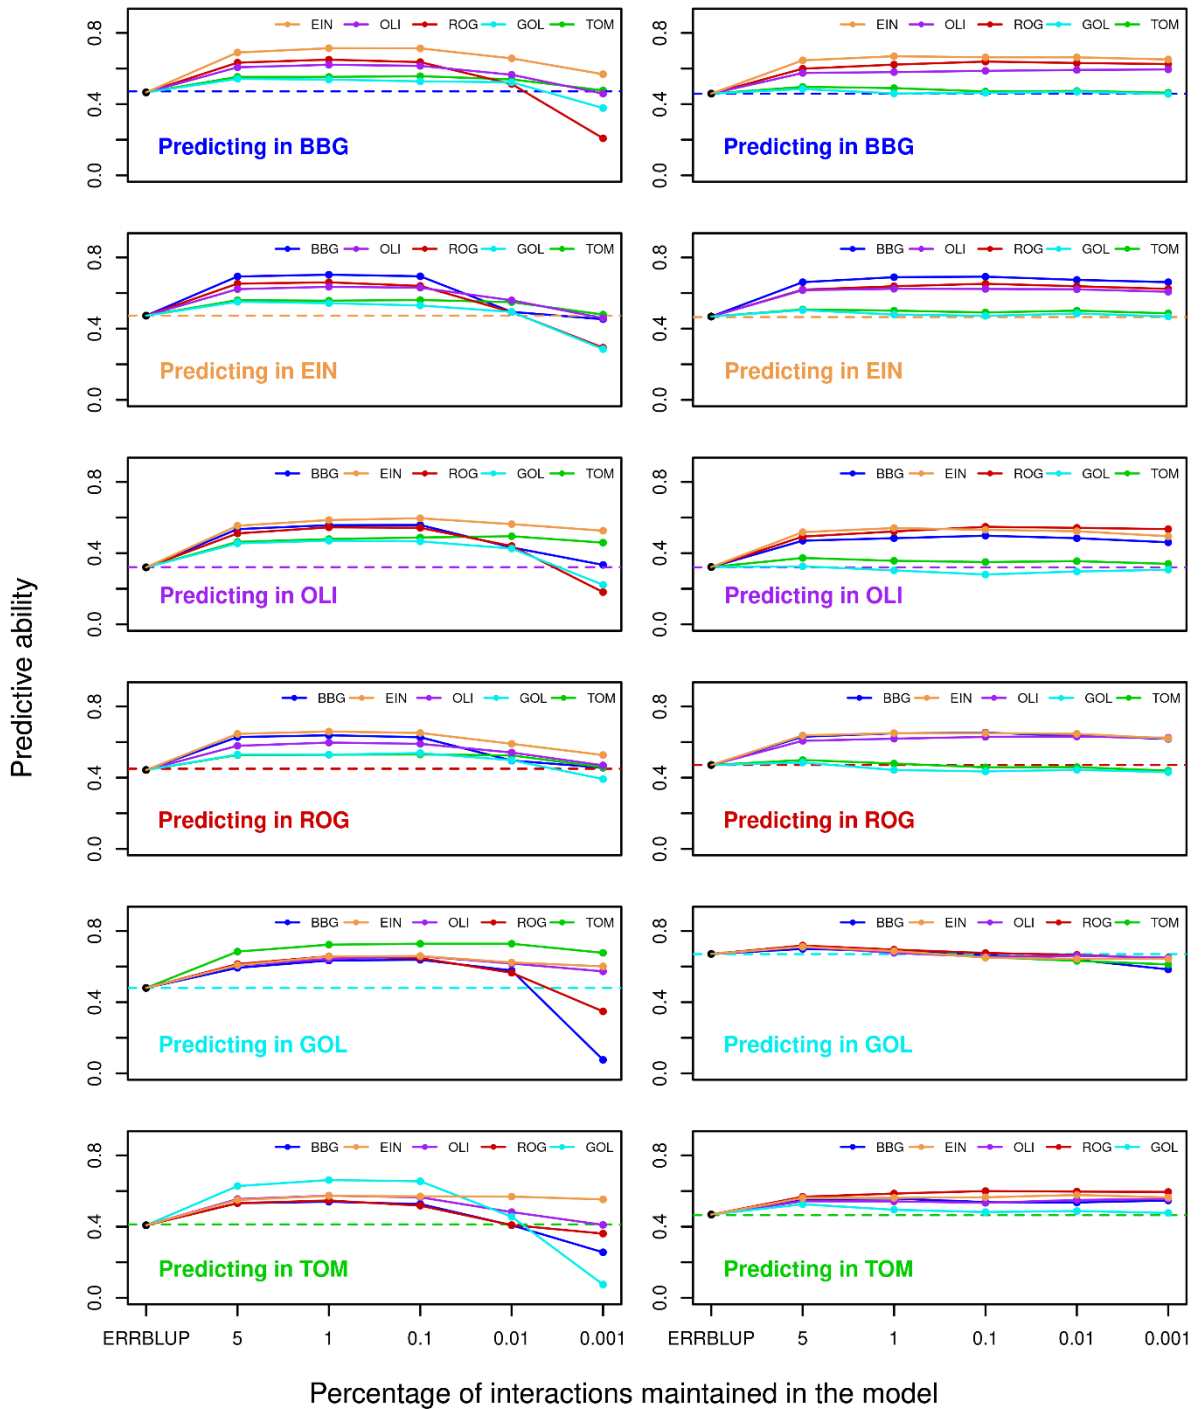

**Fig. S6a** Predictive ability for univariate GBLUP within environment (dashed horizontal line), univariate ERRBLUP within environment (black filled circle) and univariate sERRBLUP across environments when the SNP interaction selections are based on estimated effects variances (solid colored lines) for trait PH-V6 in KE (left side plots) and PE (right side plots). In each panel, the solid lines' color indicates the environment in which the relationship matrices determined by variable selection.

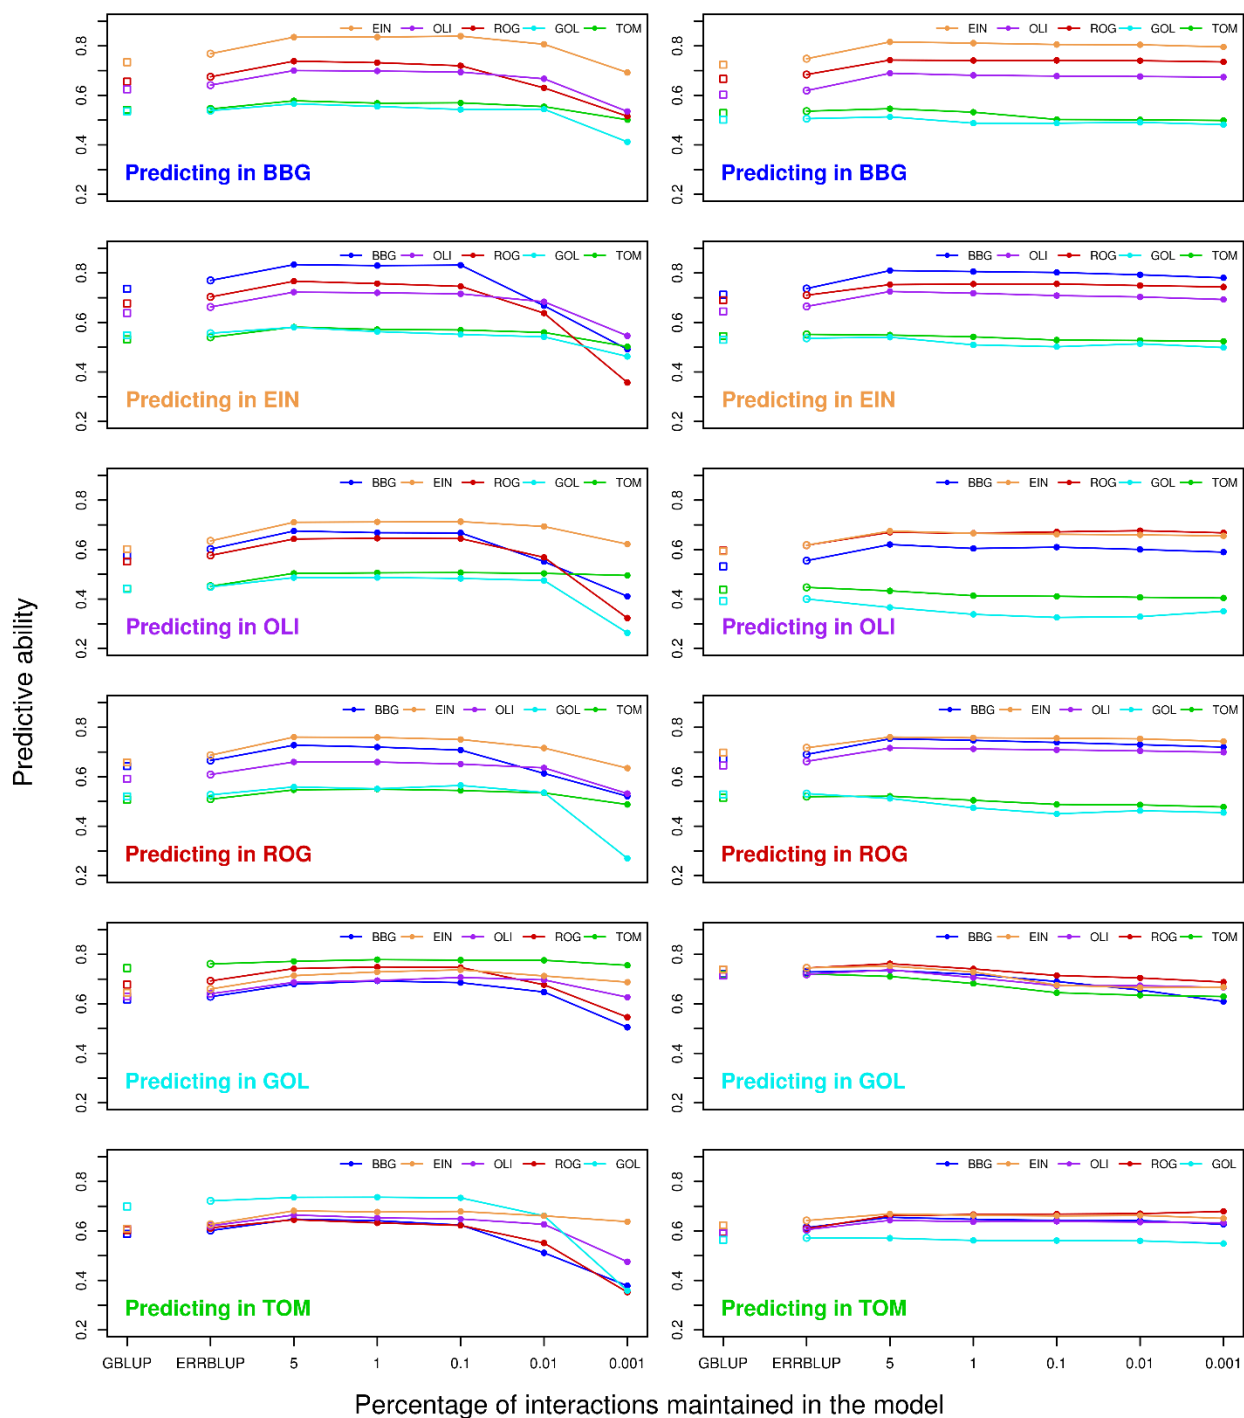

**Fig. S6b** Predictive ability for bivariate GBLUP (open squares), bivariate ERRBLUP (open circles) and bivariate sERRBLUP (filled circles and solid lines) when SNP interaction selections are based on estimated effects variances in KE (left side) and PE (right side) for trait PH-V6. In each panel, the solid lines' color indicates the additional environment used to predict the target environment.

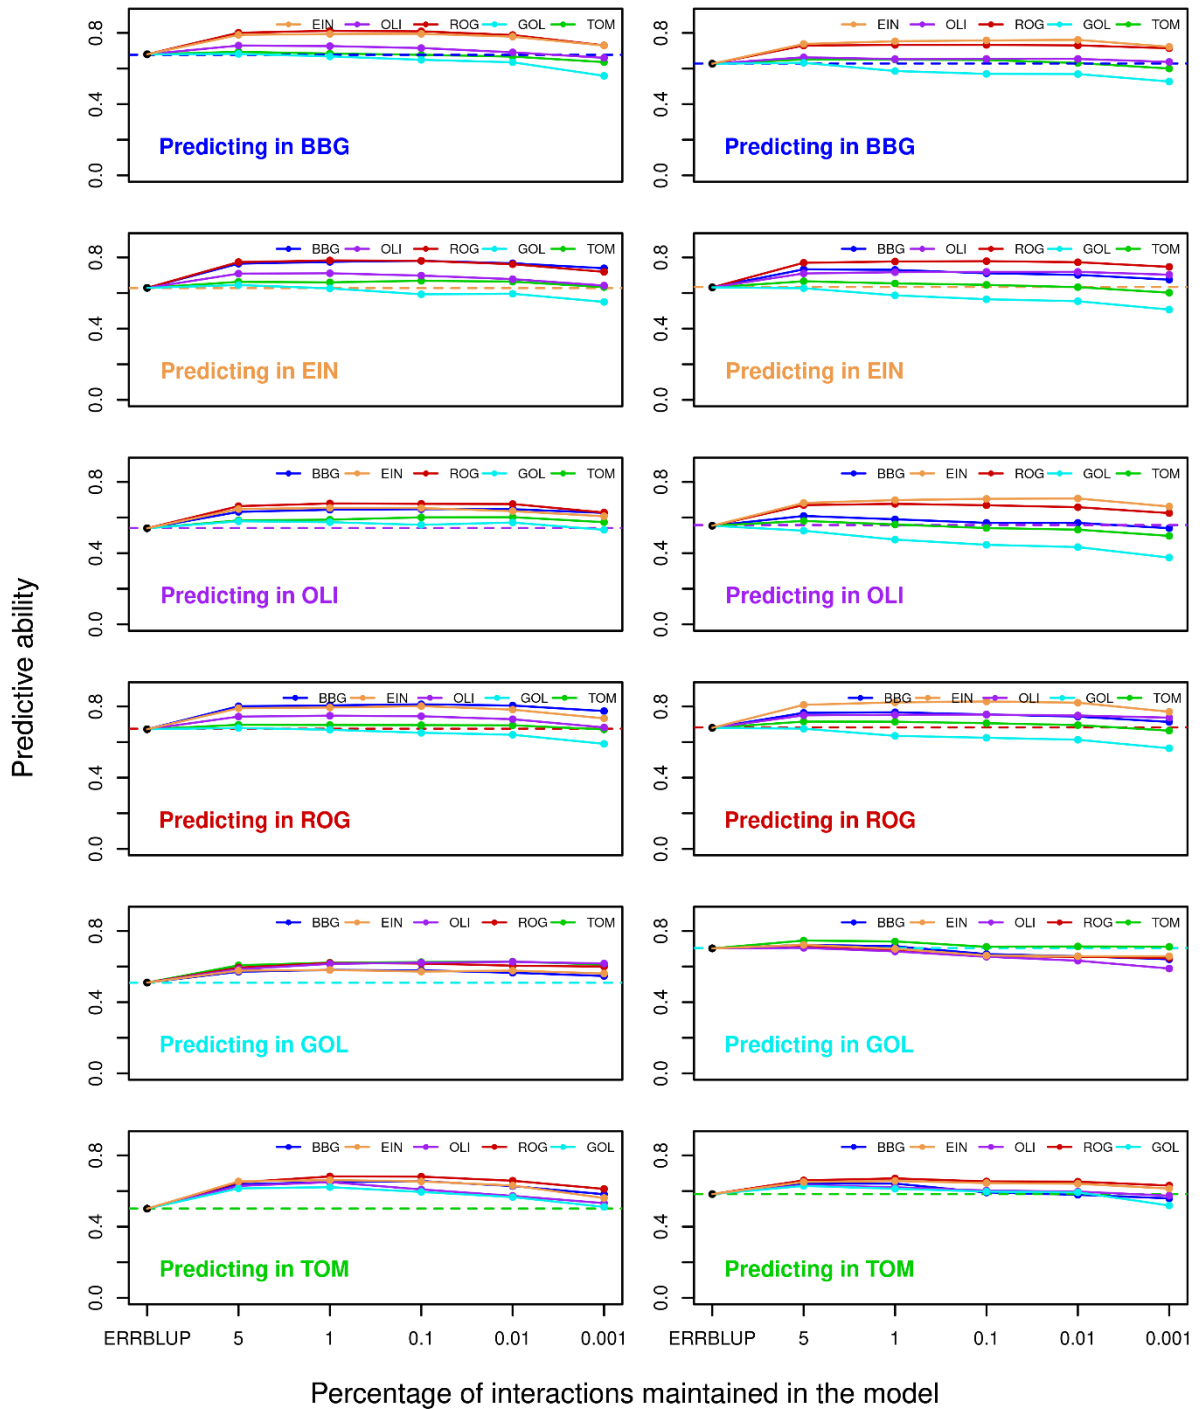

**Fig. S7a** Predictive ability for univariate GBLUP within environment (dashed horizontal line), univariate ERRBLUP within environment (black filled circle) and univariate sERRBLUP across environments when the SNP interaction selections are based on estimated effects variances (solid colored lines) for trait PH-final in KE (left side plots) and PE (right side plots). In each panel, the solid lines' color indicates the environment in which the relationship matrices determined by variable selection.



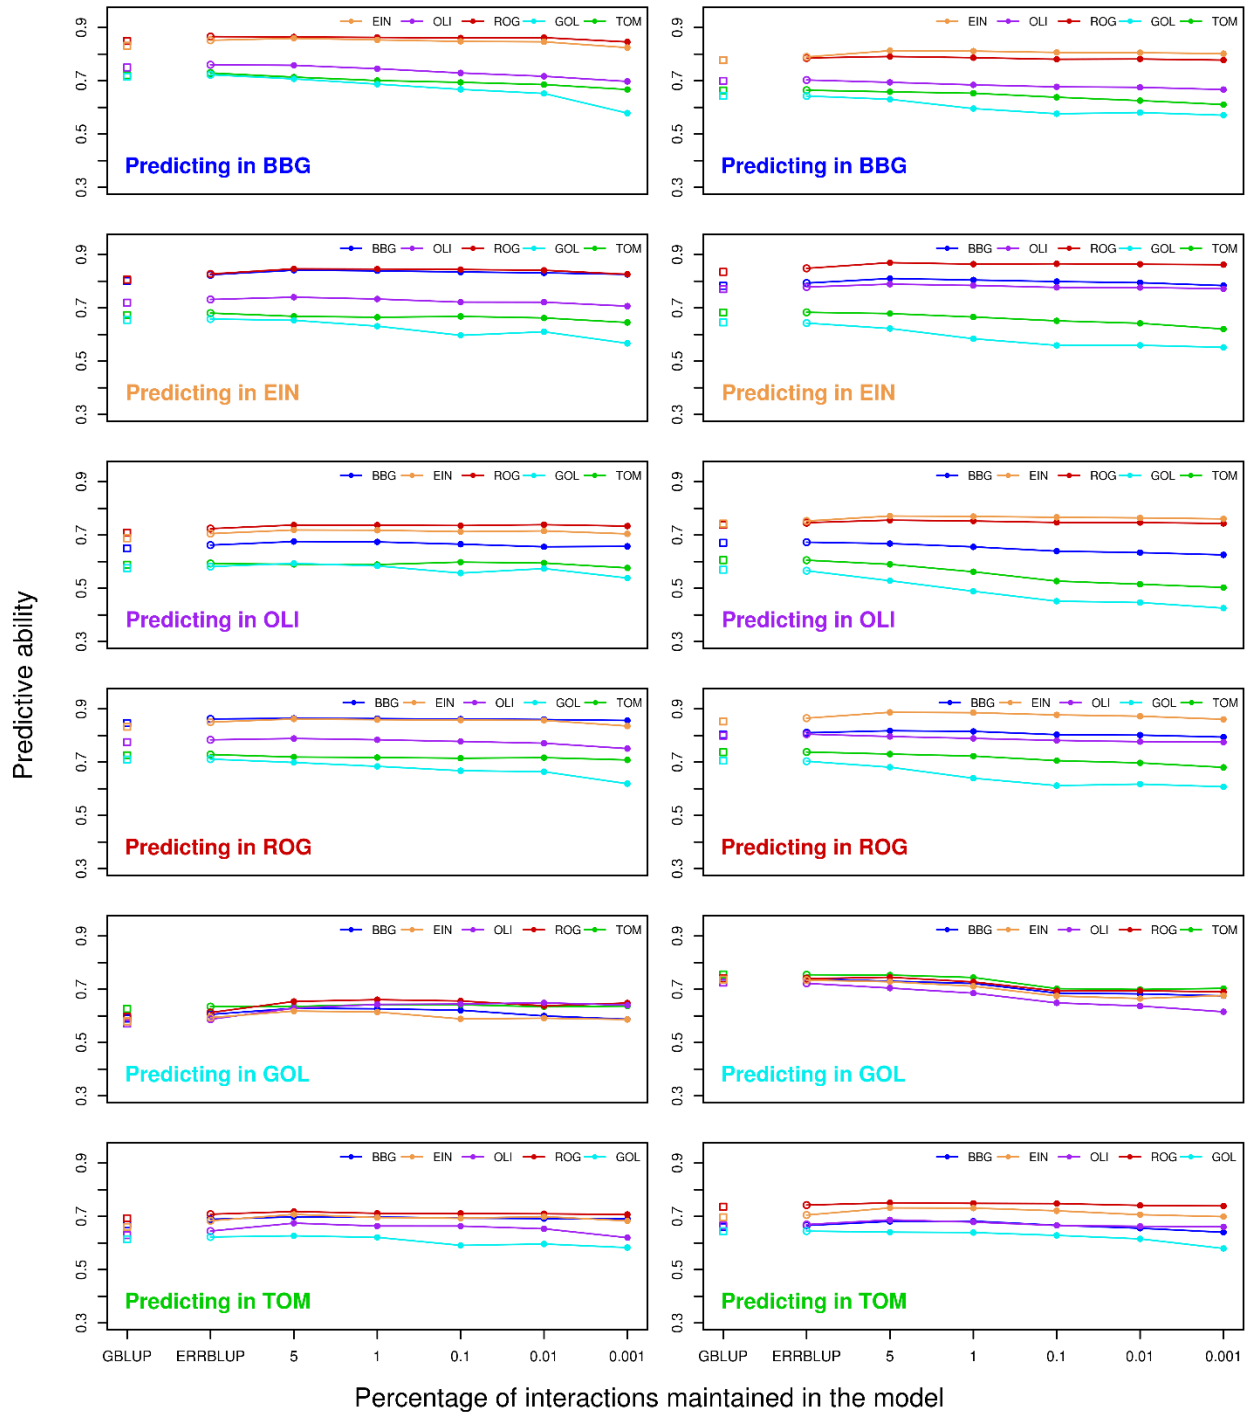

**Fig. S7b** Predictive ability for bivariate GBLUP (open squares), bivariate ERRBLUP (open circles) and bivariate sERRBLUP (filled circles and solid lines) when SNP interaction selections are based on estimated effects variances in KE (left side) and PE (right side) for trait PH-final. In each panel, the solid lines' color indicates the additional environment used to predict the target environment.

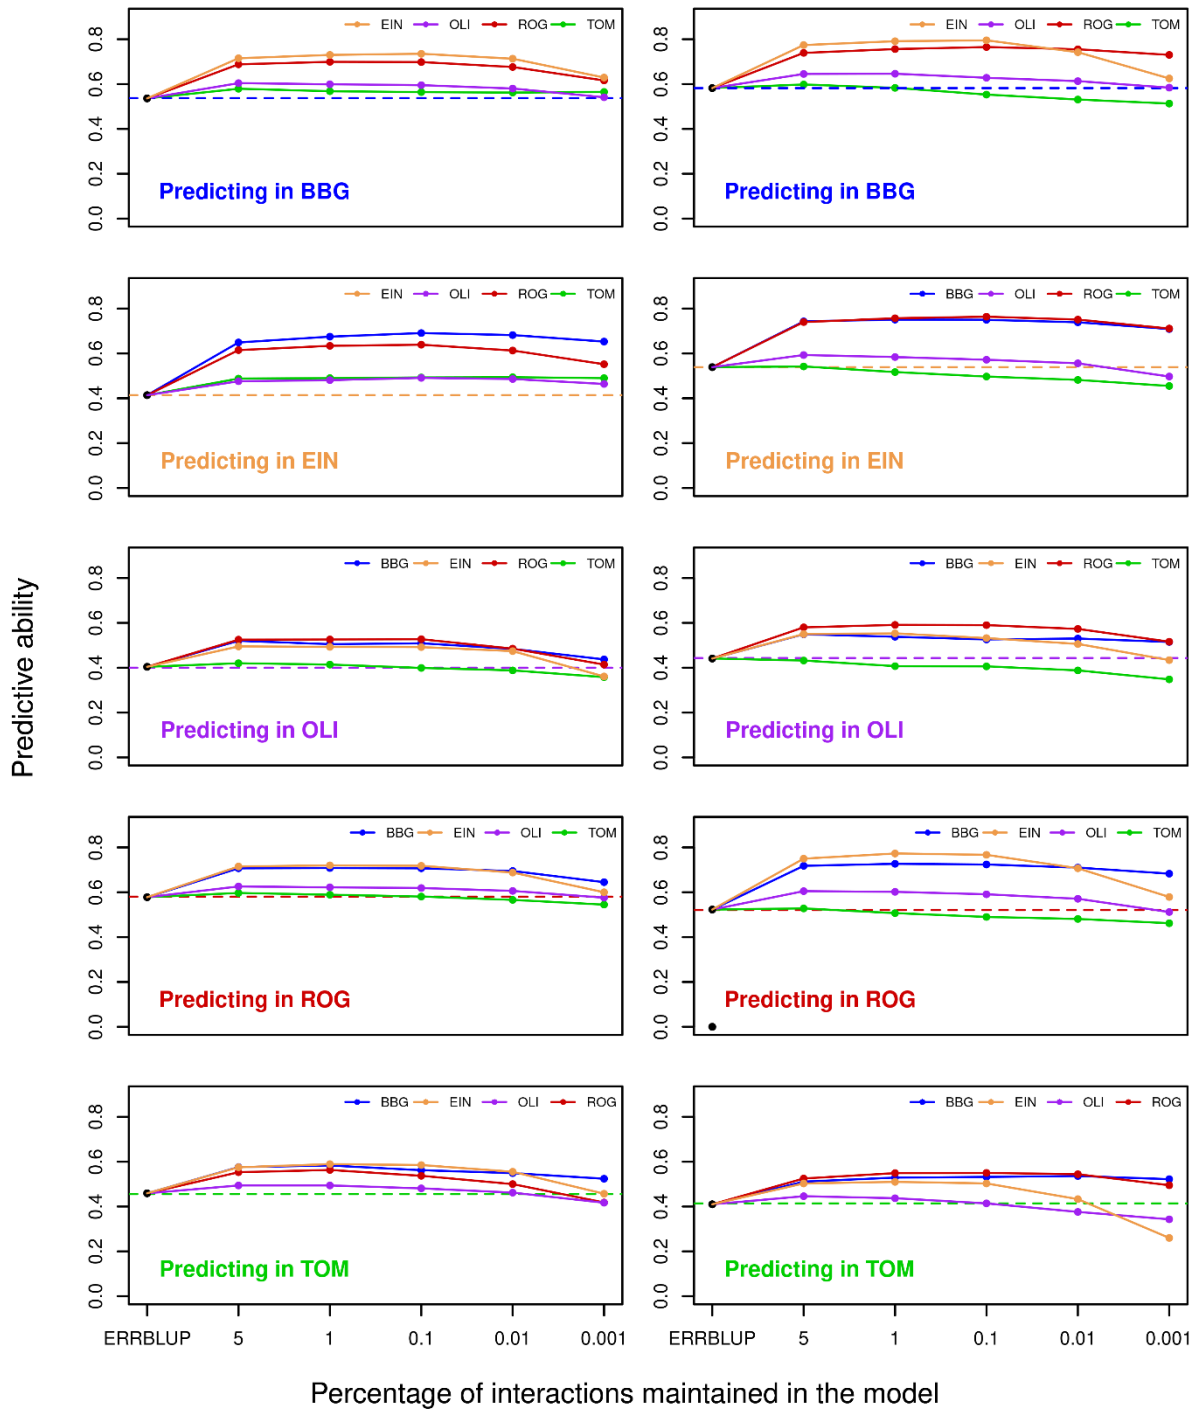

**Fig. S8a** Predictive ability for univariate GBLUP within environment (dashed horizontal line), univariate ERRBLUP within environment (black filled circle) and univariate sERRBLUP across environments when the SNP interaction selections are based on estimated effects variances (solid colored lines) for trait FF in KE (left side plots) and PE (right side plots). In each panel, the solid lines' color indicates the environment in which the relationship matrices determined by variable selection.

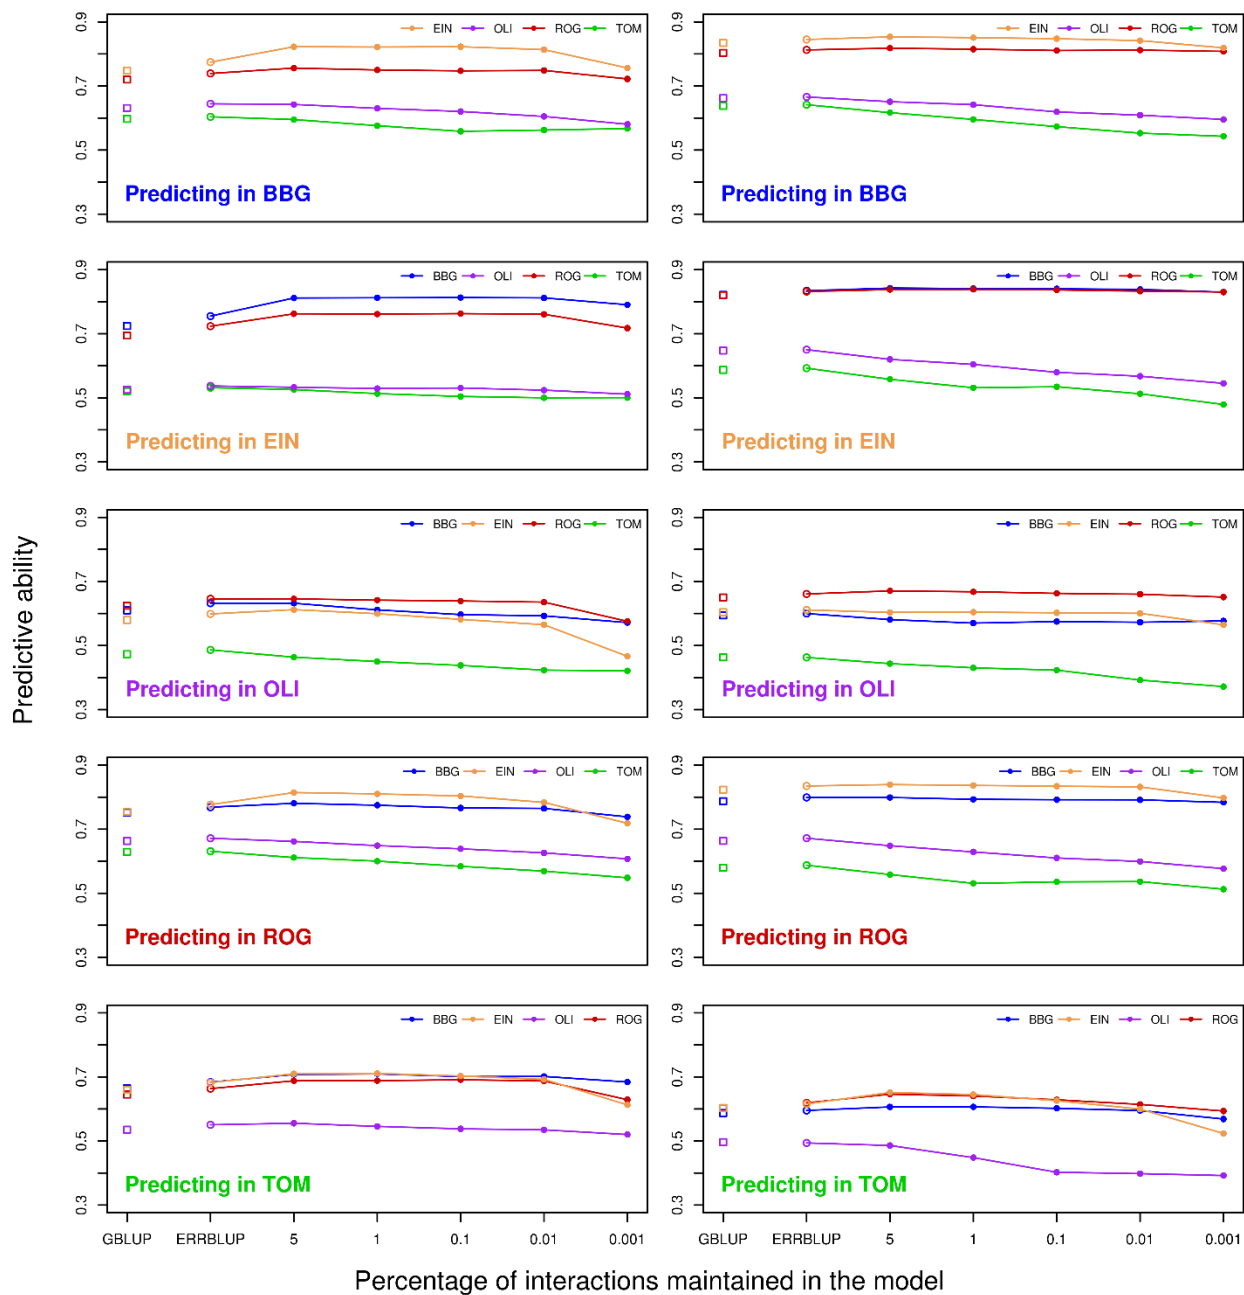

**Fig. S8b** Predictive ability for bivariate GBLUP (open squares), bivariate ERRBLUP (open circles) and bivariate sERRBLUP (filled circles and solid lines) when SNP interaction selections are based on estimated effects variances in KE (left side) and PE (right side) for trait FF. In each panel, the solid lines' color indicates the additional environment used to predict the target environment.

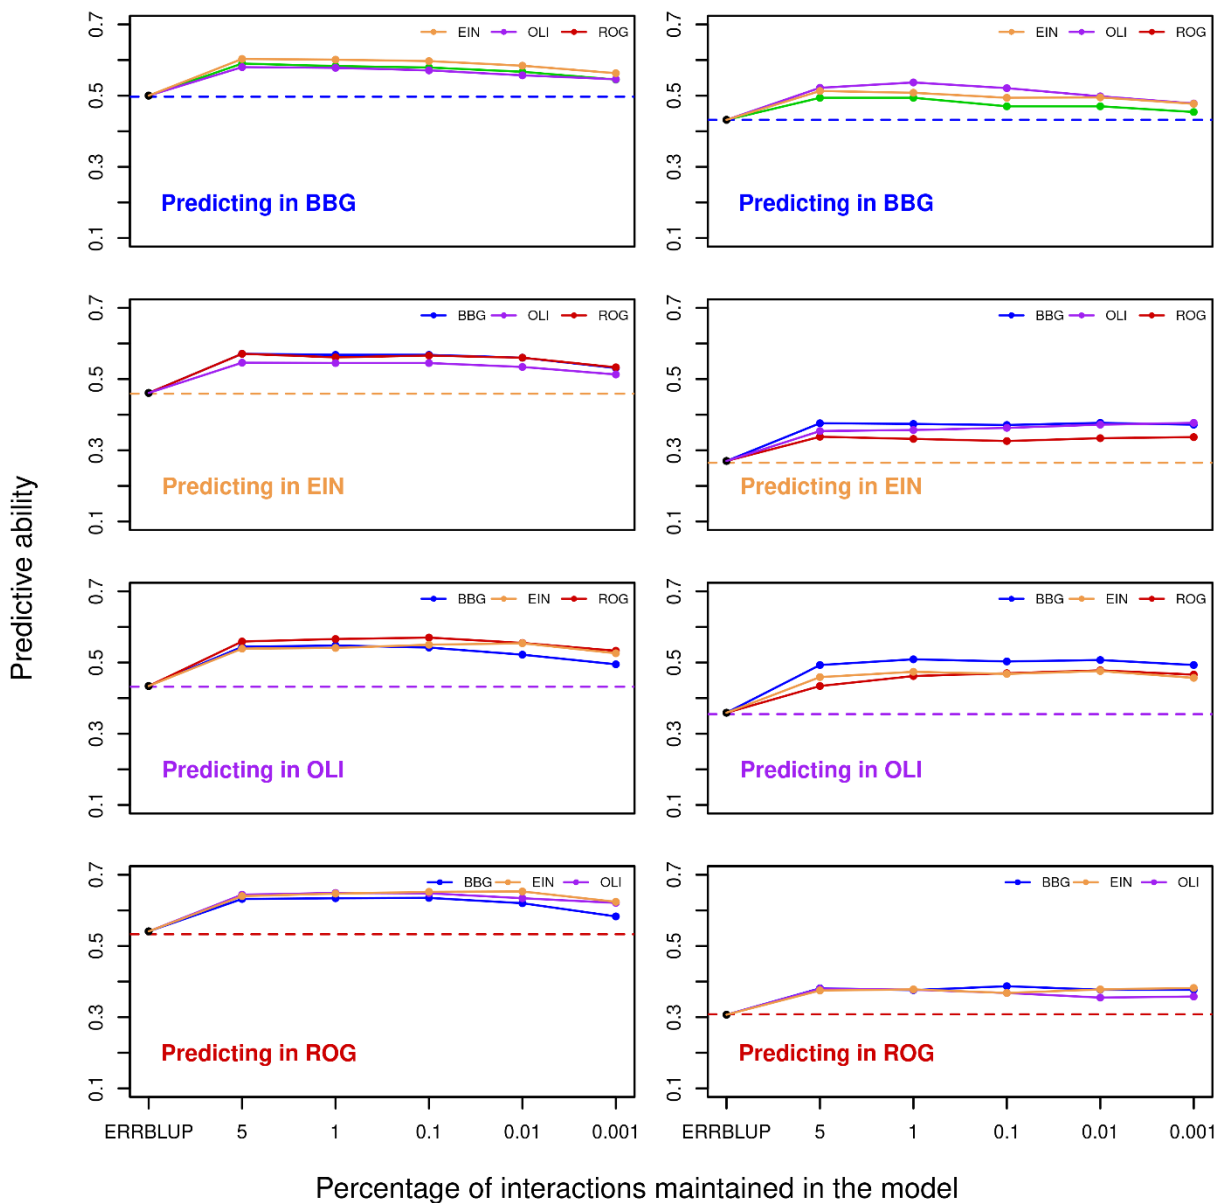

**Fig. S9a** Predictive ability for univariate GBLUP within environment (dashed horizontal line), univariate ERRBLUP within environment (black filled circle) and univariate sERRBLUP across environments when the SNP interaction selections are based on estimated effects variances (solid colored lines) for trait RL in KE (left side plots) and PE (right side plots). In each panel, the solid lines' color indicates the environment in which the relationship matrices determined by variable selection.

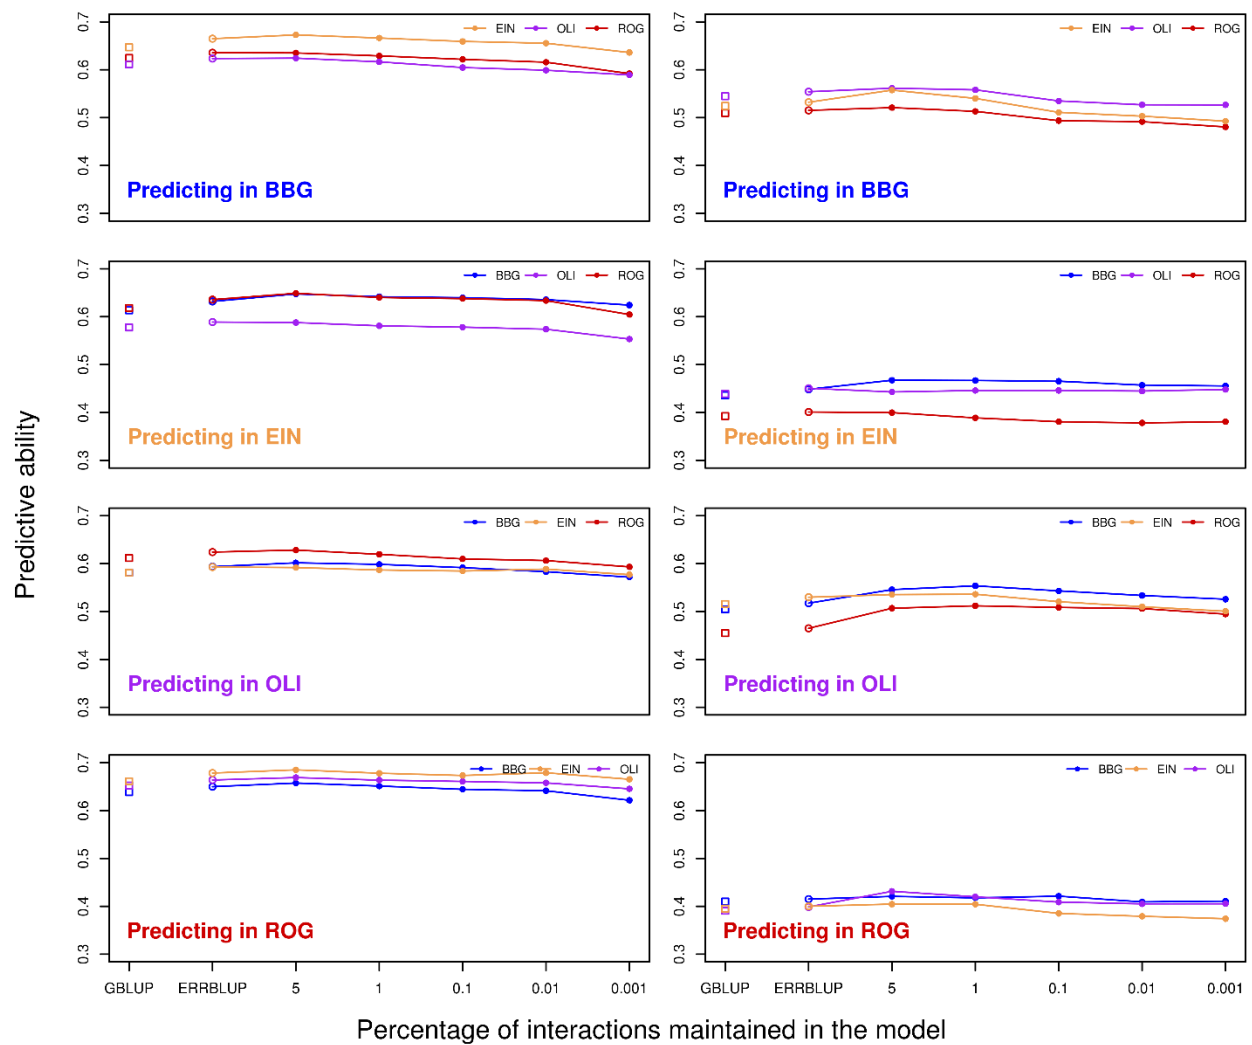

**Fig. S9b** Predictive ability for bivariate GBLUP (open squares), bivariate ERRBLUP (open circles) and bivariate sERRBLUP (filled circles and solid lines) when SNP interaction selections are based on estimated effects variances in KE (left side) and PE (right side) for trait RL. In each panel, the solid lines' color indicates the additional environment used to predict the target environment

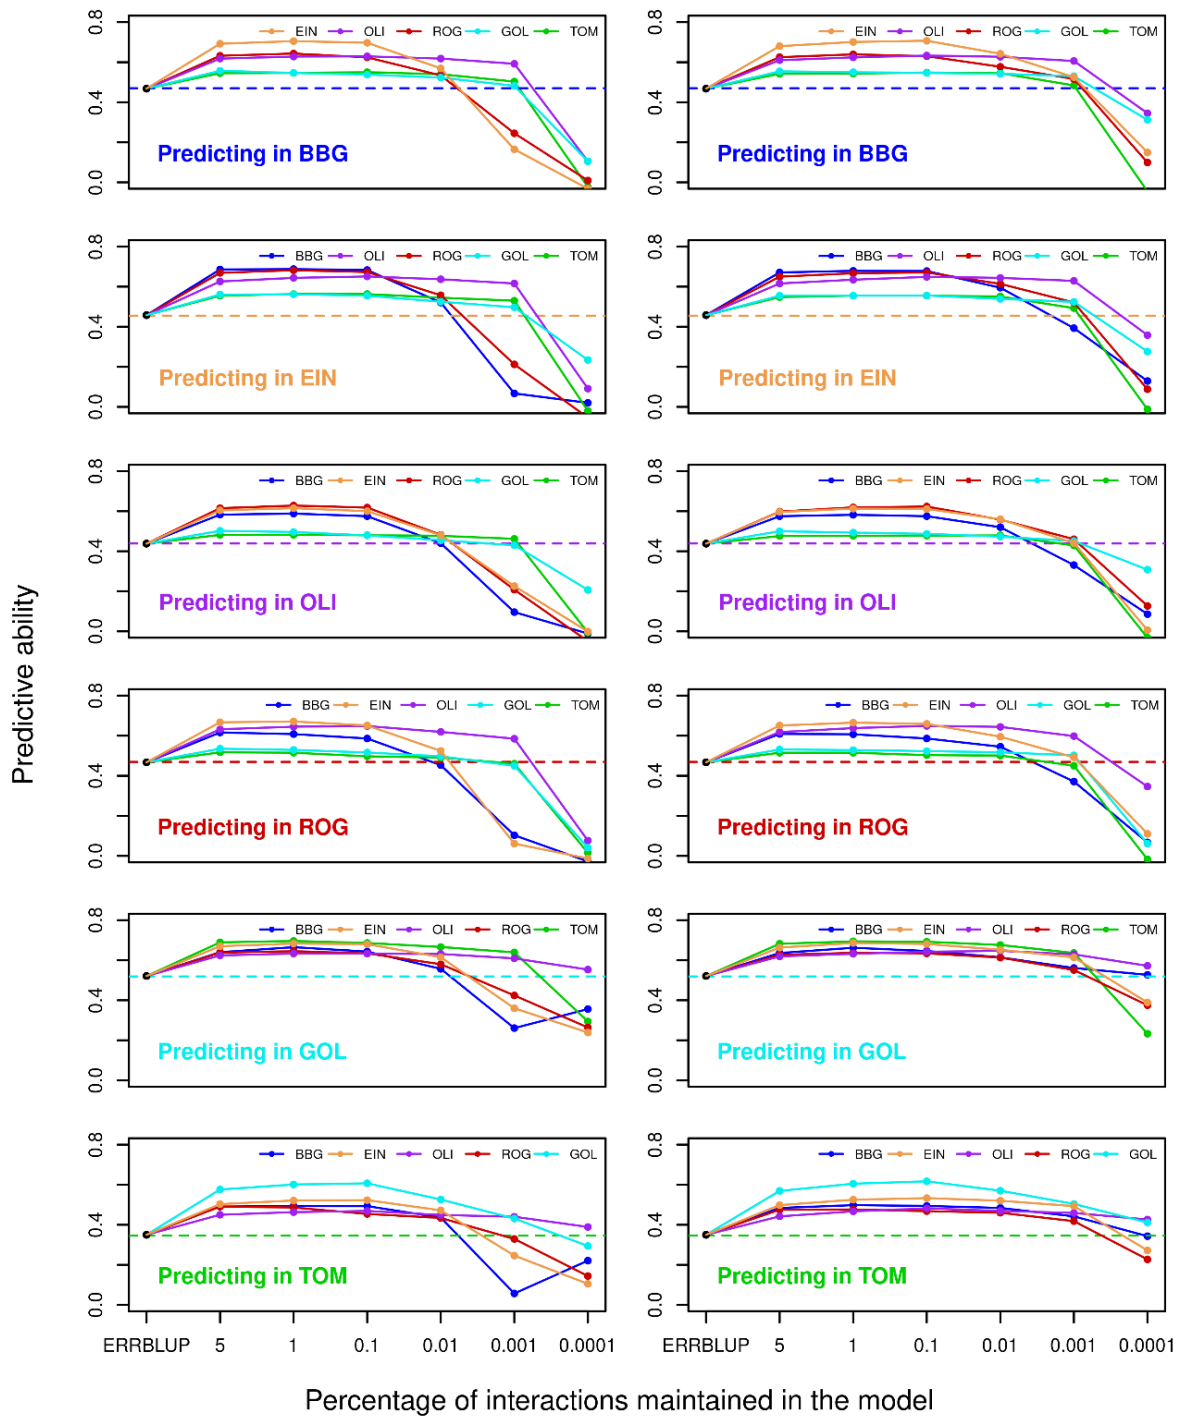

**Fig. S10** Predictive ability for univariate GBLUP within environment (dashed horizontal line), univariate ERRBLUP within environment (black filled circle) and univariate sERRBLUP across environments (solid colored lines) when SNP interaction selections are based on estimated effects sizes (left side) and estimated effects variances (right side) for trait PH-V4 in KE. In each panel, the solid lines' color indicates the environment in which the relationship matrices were determined by variable selection.

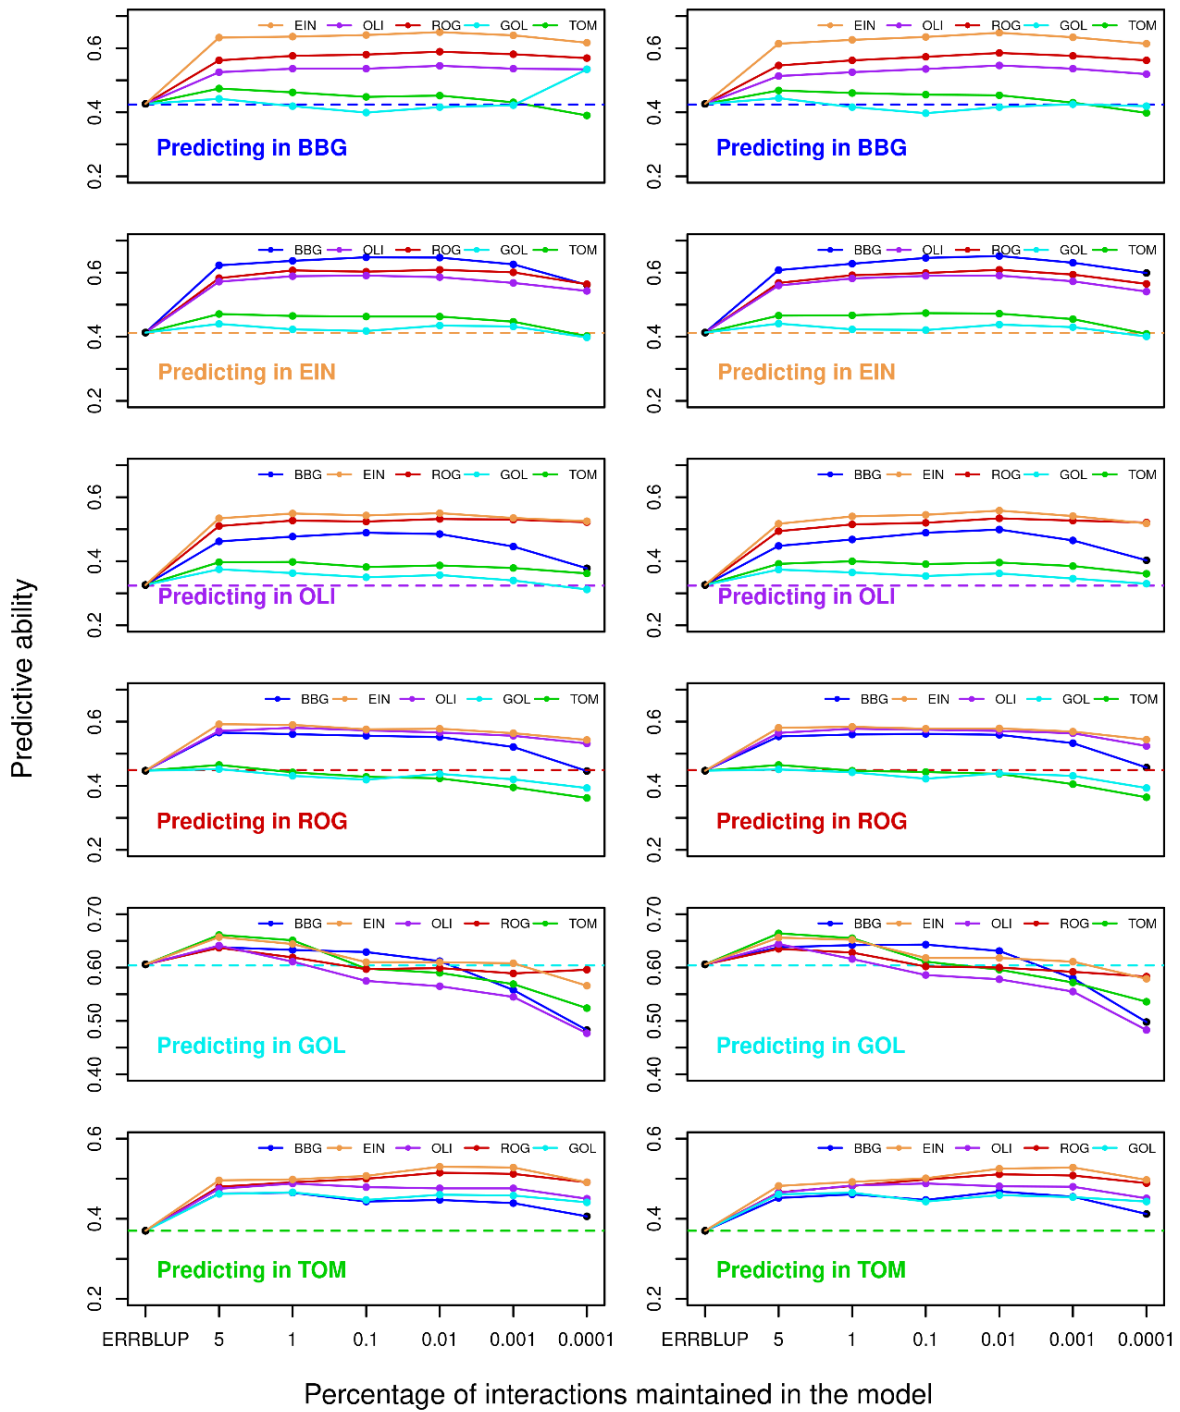

**Fig. S11** Predictive ability for univariate GBLUP within environment (dashed horizontal line), univariate ERRBLUP within environment (black filled circle) and univariate sERRBLUP across environments (solid colored lines) when SNP interaction selections are based on estimated effects sizes (left side) and estimated effects variances (right side) for trait PH-V4 in PE. In each panel, the solid lines' color indicates the environment in which the relationship matrices were determined by variable selection.

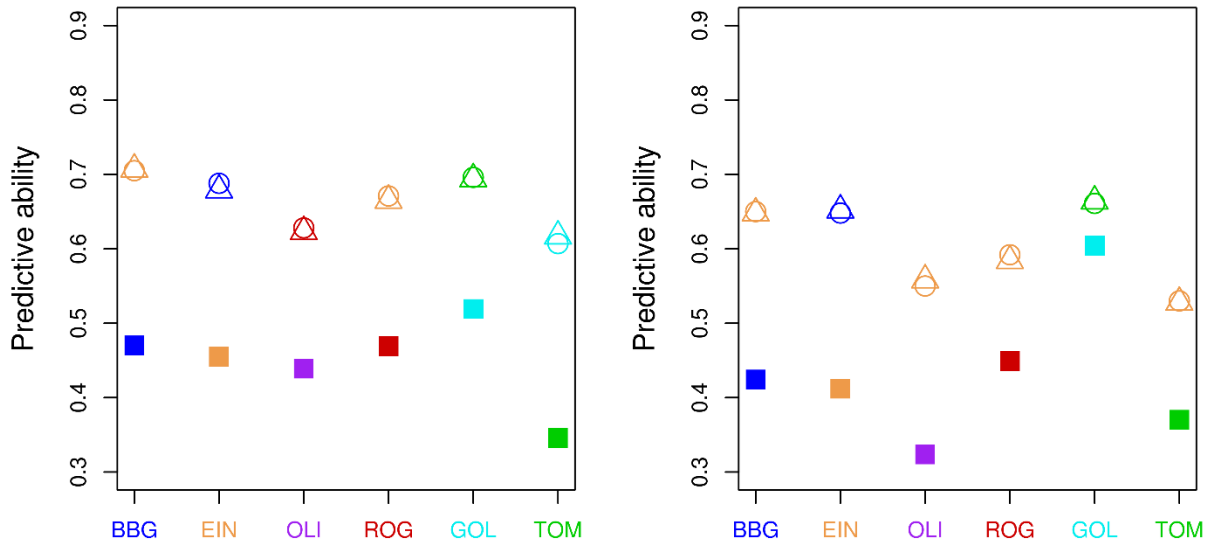

**Fig. S12** Comparison of predictive ability of univariate GBLUP within environments (filled squares) and the maximum predictive ability of univariate sERRBLUP across environments when the SNP interaction selections are based on estimated effects sizes (circles) and estimated effects variances (triangles) for trait PH-V4 in KE (left side plot) and in PE (right side plot). The colors dark blue, orange, purple, red, light blue and green represent the environments BBG, EIN, OLI, ROG, GOL and TOM, respectively. The circles' and triangles' colors indicate the environment which had the maximum predictive ability for this respective target environment.



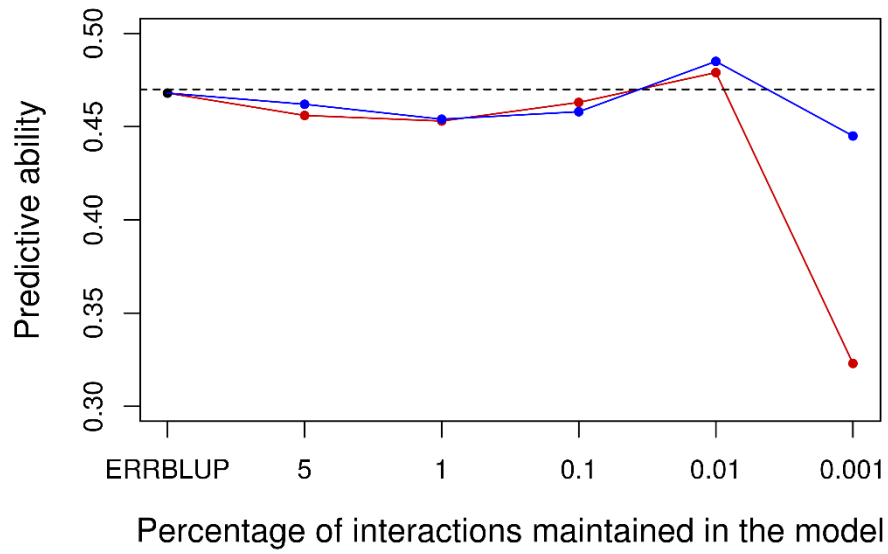

**Fig. S13** Predictive ability for univariate GBLUP within Bernburg (dashed horizontal line), univariate ERRBLUP within Bernburg (black filled circle) and univariate sERRBLUP when the SNP interaction selections are based on estimated effects variances (blue solid line) and estimated effect sizes (red solid line) within Bernburg for trait PH-V4 in KE.

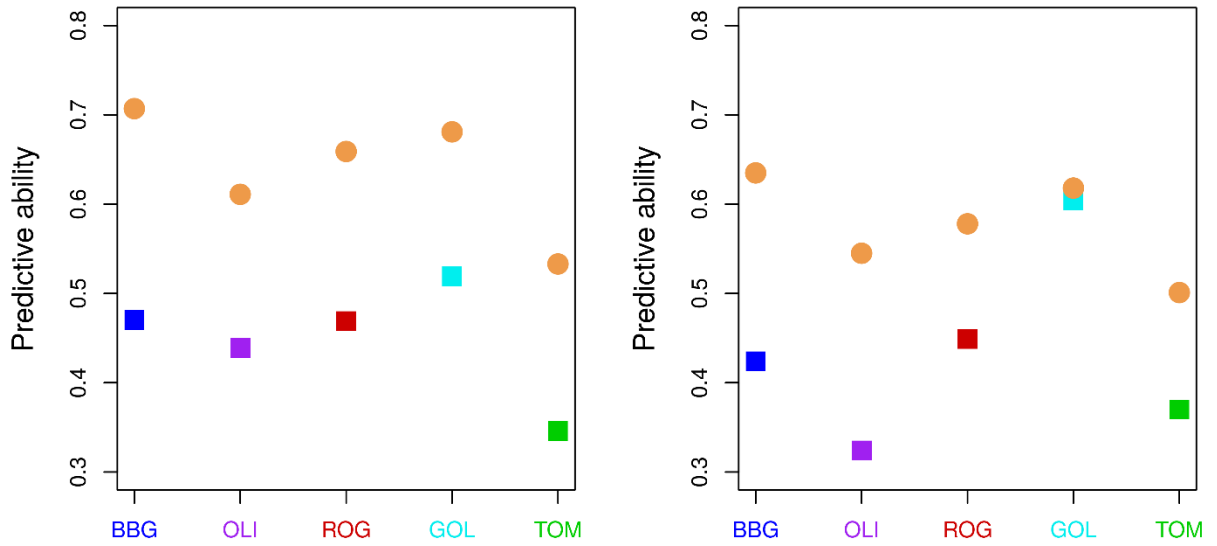

**Fig. S14** Comparison of predictive ability of univariate GBLUP within environments (filled squares) and the maximum predictive ability of univariate sERRBLUP across EIN when the SNP interaction selections are based on estimated effects variances (orange circles) for trait PH-V4 in KE (left side plot) and in PE (right side plot). The colors dark blue, purple, red, light blue and green represent the environments BBG, OLI, ROG, GOL and TOM, respectively.

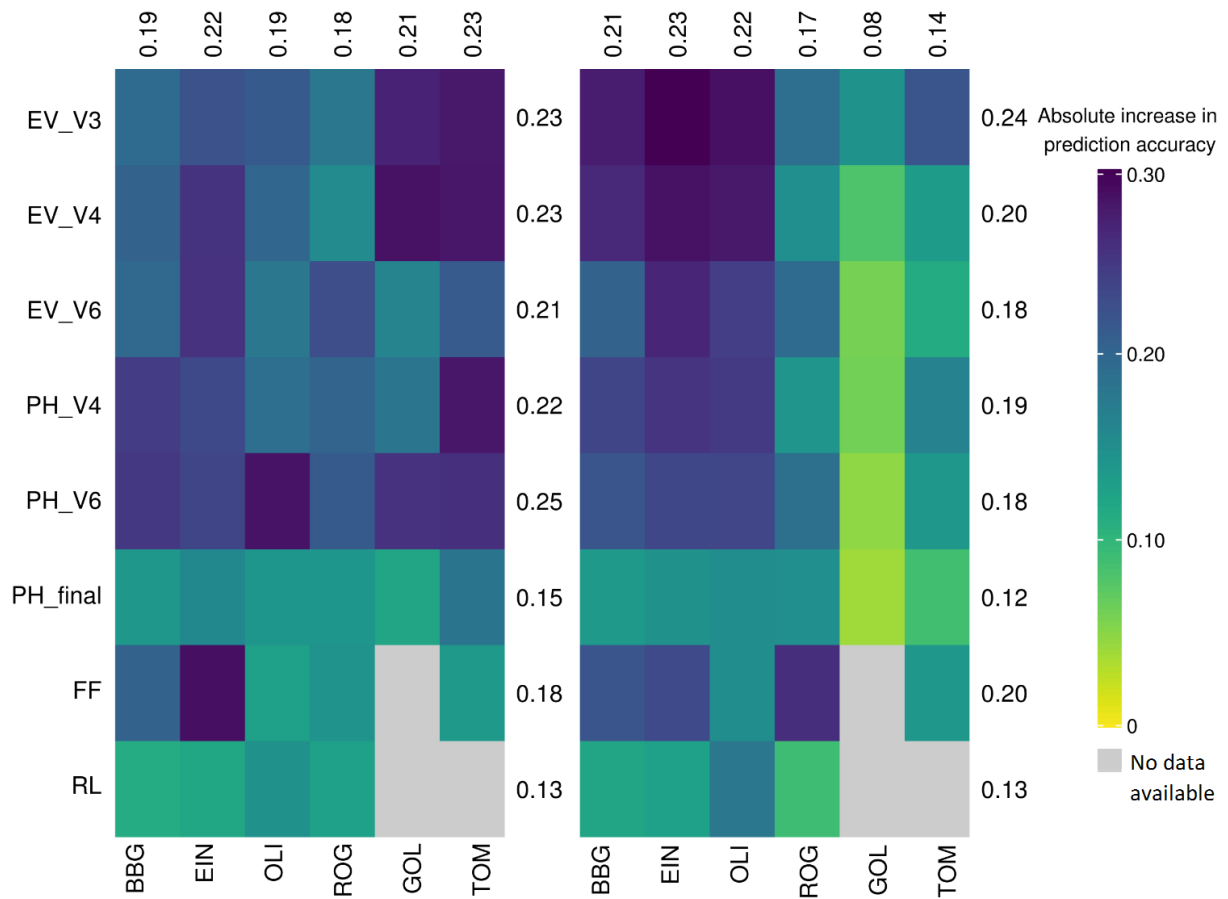

**Fig. S15a** Absolute increase in prediction accuracy from univariate GBLUP within environments to the maximum prediction accuracy of univariate sERRBLUP across environments when the SNP interaction selections are based on estimated effects variances in KE (left side plot) and in PE (right side plot). The average of absolute increase in prediction accuracy for each trait and environments are display in rows and columns, respectively.

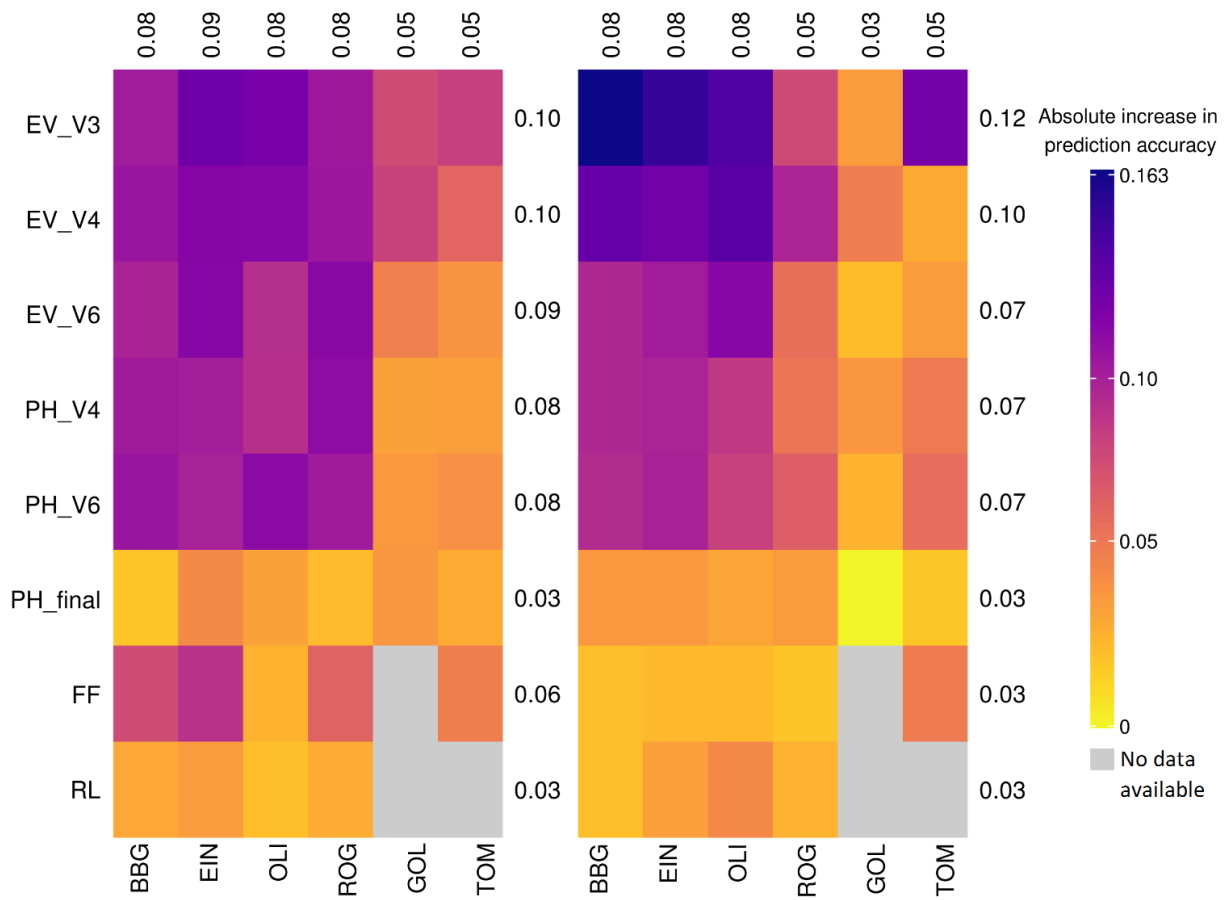

**Fig. S15b** Absolute increase in prediction accuracy from maximum bivariate GBLUP the maximum prediction accuracy of bivariate sERRBLUP when the SNP interaction selections are based on estimated effects variances in KE (left side plot) and in PE (right side plot). The average of absolute increase in prediction accuracy for each trait and environments are display in rows and columns, respectively.

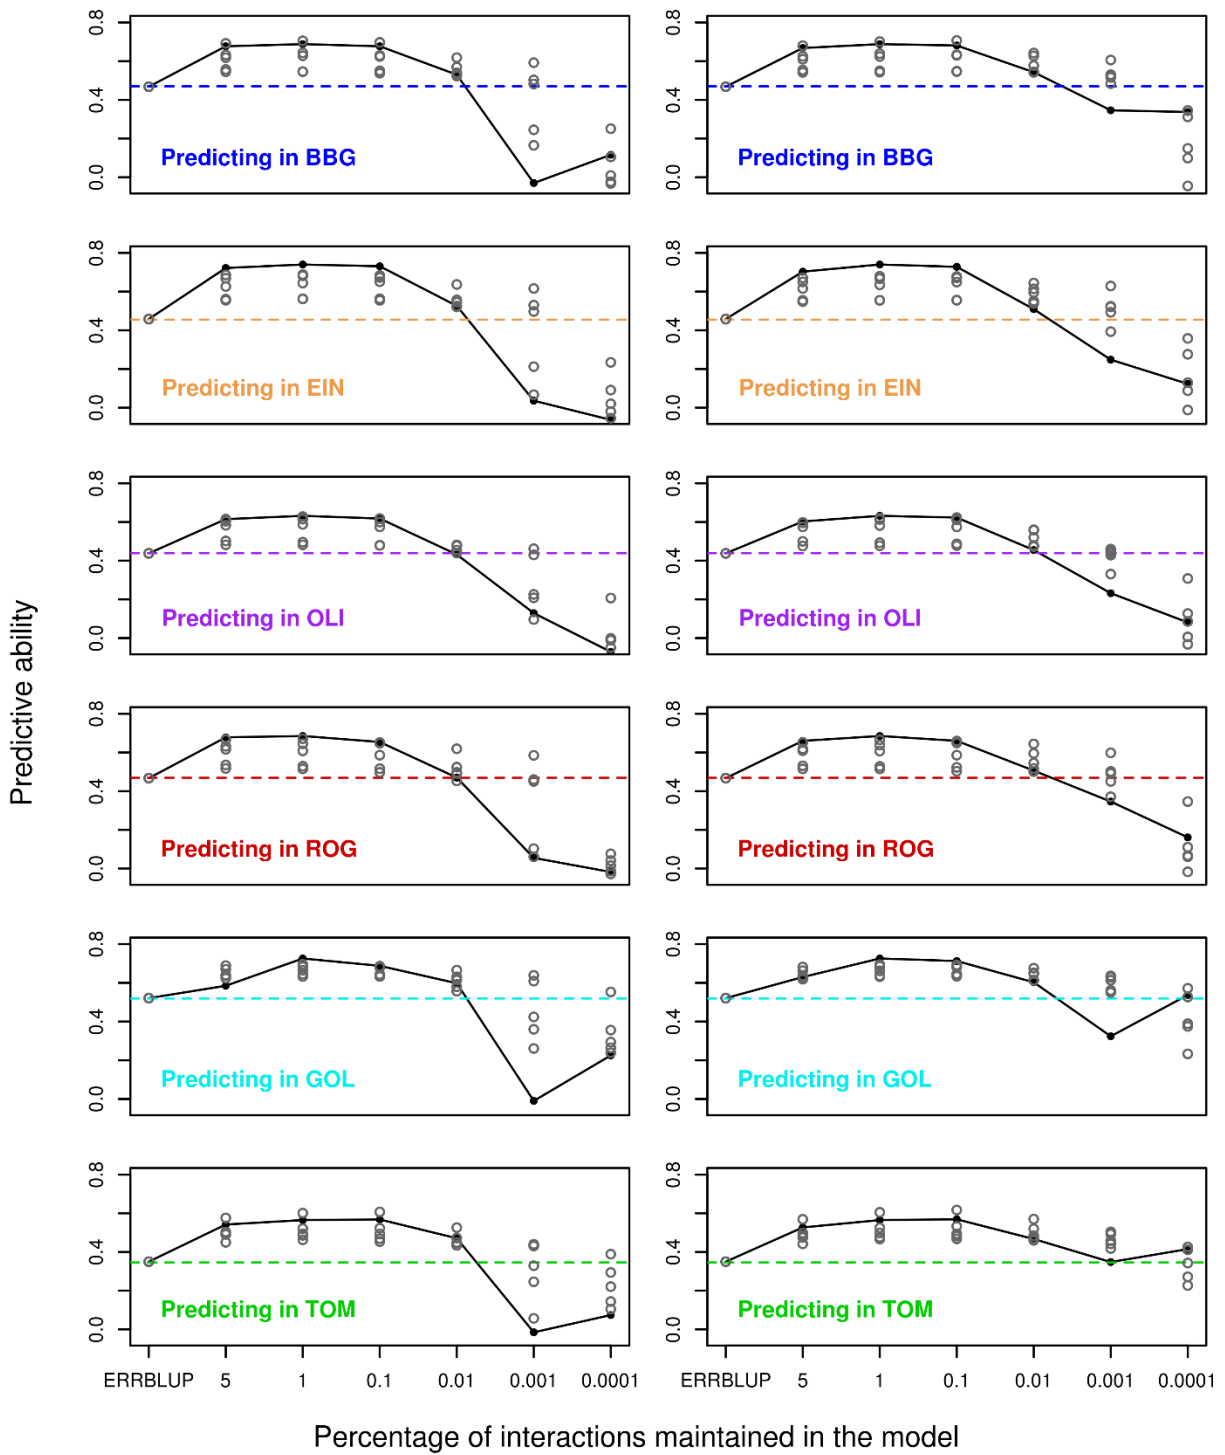

**Fig. S16** Predictive ability for univariate GBLUP within environment (dashed horizontal line), univariate ERRBLUP within environment (gray open circle), univariate sERRBLUP using a single environment for selecting the SNP interactions (gray open circles) and univariate sERRBLUP using all 5 environments jointly (filled black circles and solid line) for the SNP interaction selection based on estimated effects sizes (left side) and estimated effects variances (right side) for trait PH-V4 in KE.

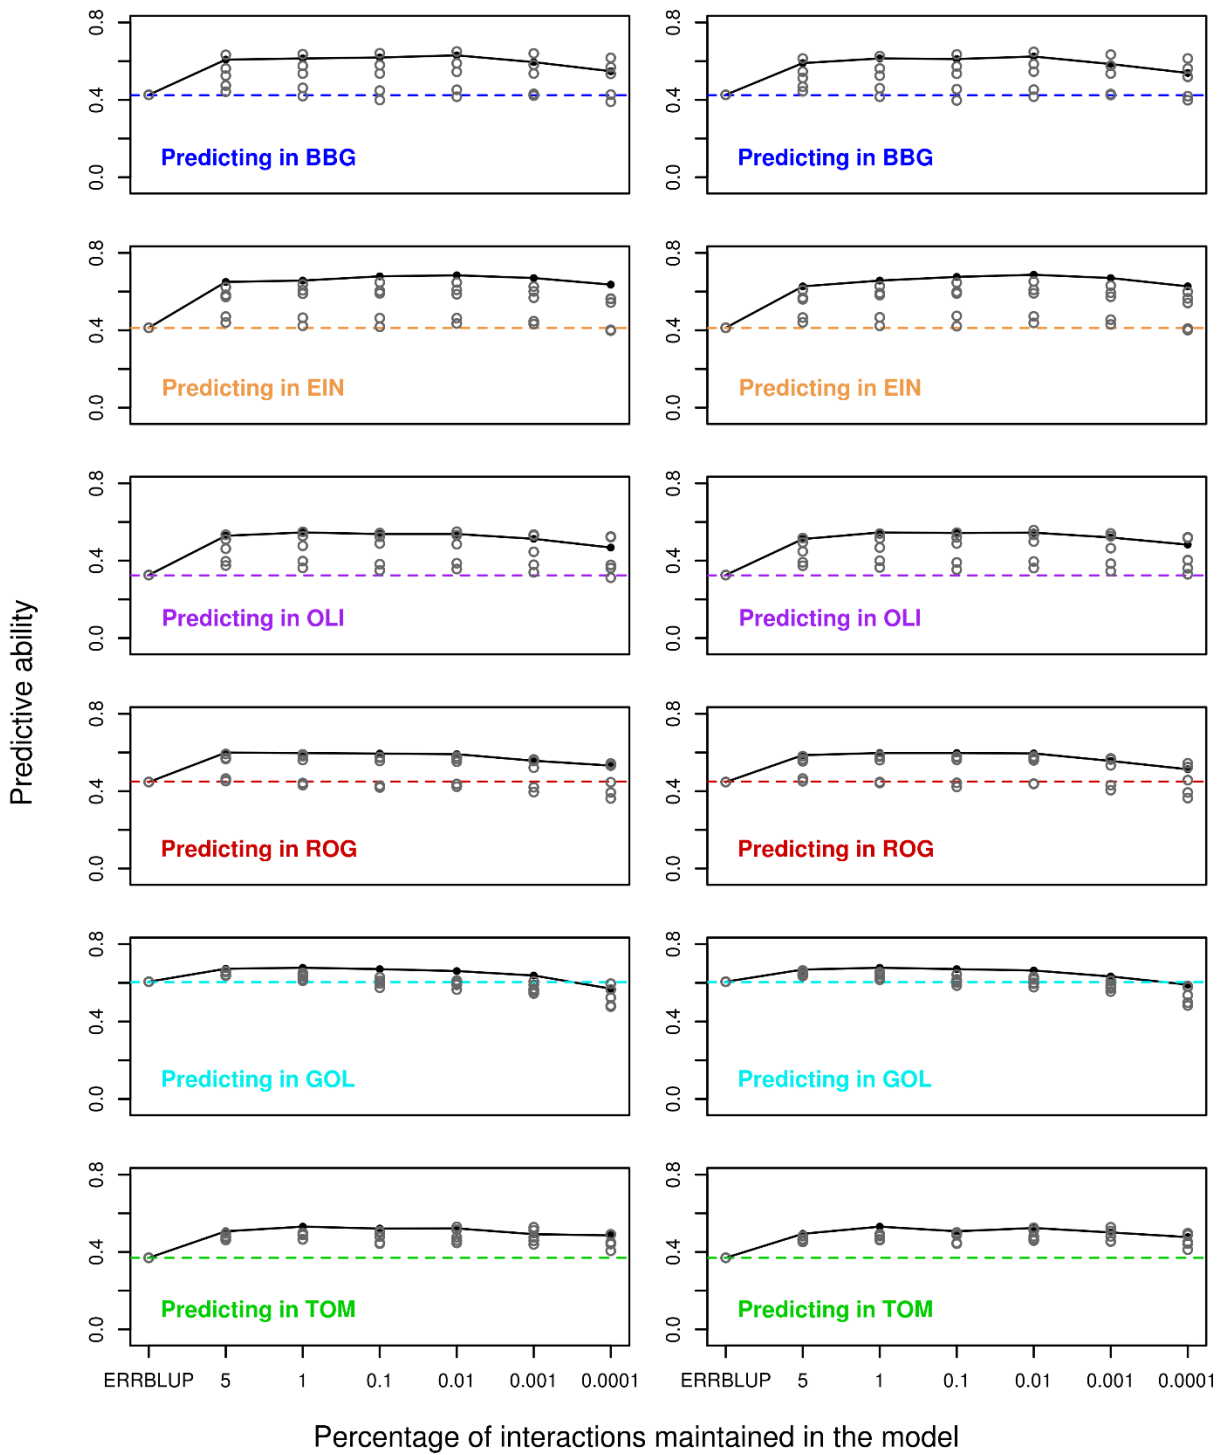

**Fig. S17** Predictive ability for univariate GBLUP within environment (dashed horizontal line), univariate ERRBLUP within environment (gray open circle), univariate sERRBLUP using a single environment for selecting the SNP interactions (gray open circles) and univariate sERRBLUP using all 5 environments jointly (filled black circles and solid line) for the SNP interaction selection based on estimated effects sizes (left side) and estimated effects variances (right side) for trait PH-V4 in PE.

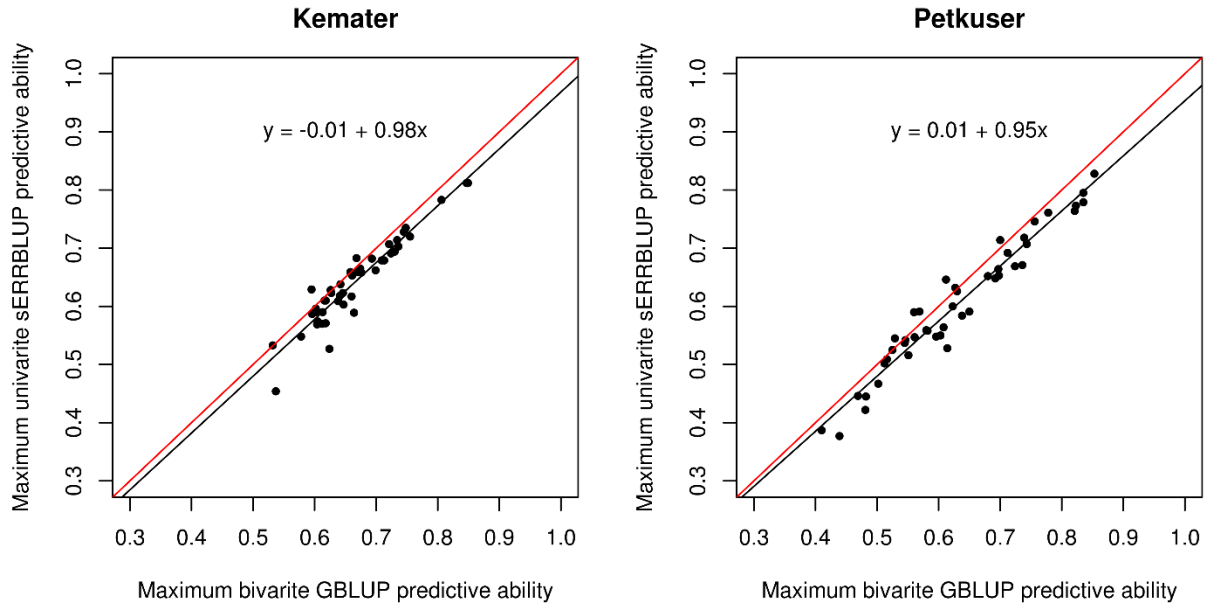

**Fig. S18** The comparison between the maximum predictive abilities of bivariate GBLUP within all six environments and the maximum predictive abilities of univariate sERRBLUP across environments for all traits in KE (left side plot) and PE (right side plot). In each plot, the diagonal line (red line) and the overall linear regression line (black line) with the regression formula are shown.

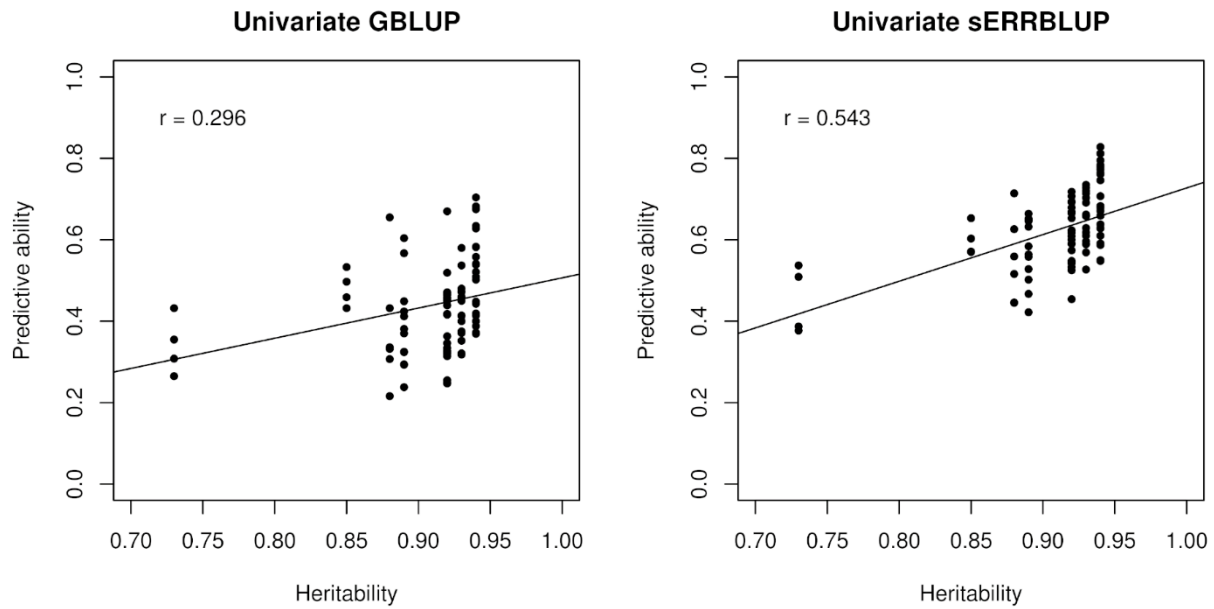

**Fig. S19a** The correlation between all eight traits' heritabilities and predictive abilities of univariate GBLUP within environments (left side) and maximum predictive abilities of univariate sERRBLUP across environments (right side) in both landraces. The black lines indicate the overall linear regression lines.

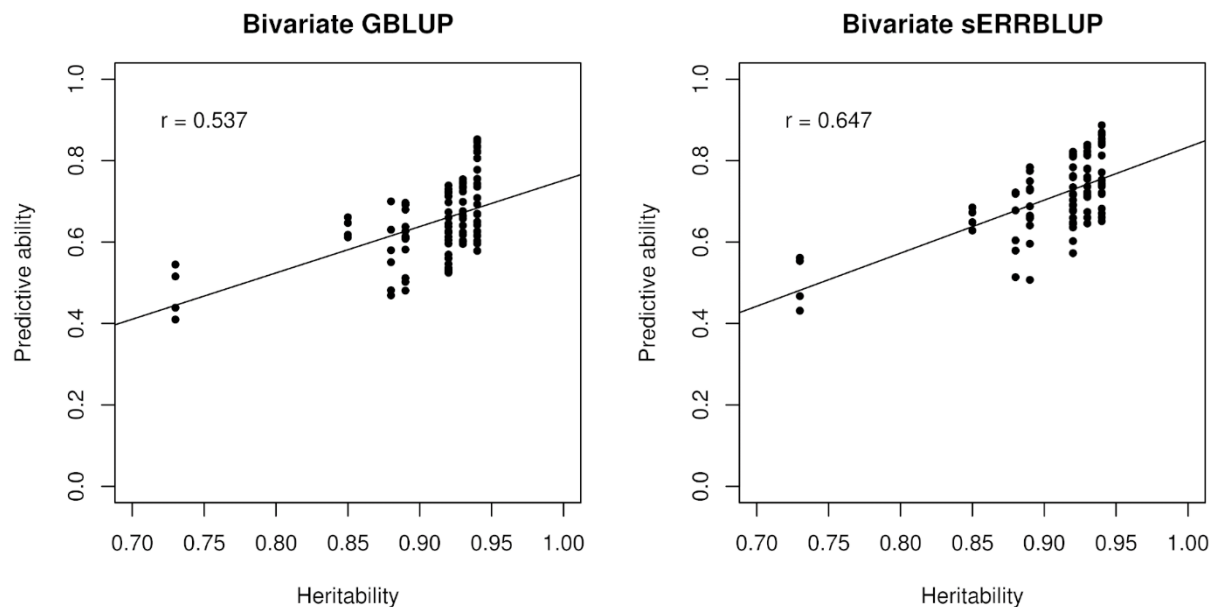

**Fig. S19b** The correlation between all eight traits' heritabilities and the maximum predictive abilities of bivariate GBLUP (left side) and maximum predictive abilities of bivariate sERRBLUP (right side) for all environments in both landraces. The black lines indicate the overall linear regression lines.
